# Supplementary material
Source: ML conference proceedings conference paper supplement (https://proceedings.neurips.cc/paper_files/paper/2023/hash/f9ad87c1ebbae8a3555adb31dbcacf44-Abstract.html)
Supplement: Supplementary file 1 [file f9ad87c1ebbae8a3555adb31dbcacf44-Supplemental-Datasets_and_Benchmarks.pdf]

---

# DISCS: A Benchmark for Discrete Sampling

---

**Katayoon Goshvadi**  
Google Deepmind

**Haoran Sun**  
Georgia Tech

**Xingchao Liu**  
UT Austin

**Azade Nova**  
Google Deepmind

**Ruqi Zhang**  
Purdue University

**Will Grathwohl**  
Google Deepmind

**Dale Schuurmans**  
Google Deepmind

**Hanjun Dai**  
Google Deepmind

## Abstract

1 Sampling in discrete spaces, with critical applications in simulation and opti-  
2 mization, has recently been boosted by significant advances in gradient-based  
3 approaches that exploit modern accelerators like GPUs. However, two key chal-  
4 lenges hinder the further research progress in discrete sampling. First, since there  
5 is no consensus on experimental settings, the empirical results in different research  
6 papers are often not comparable. Secondly, implementing samplers and target  
7 distributions often requires a nontrivial amount of effort in terms of calibration,  
8 parallelism, and evaluation. To tackle these challenges, we propose *DISCS* (DIS-  
9 Crete Sampling), a tailored package and benchmark that supports unified and  
10 efficient implementation and evaluations for discrete sampling in three types of  
11 tasks: sampling for classical graphical models, combinatorial optimization, and  
12 energy based generative models. Throughout the comprehensive evaluations in  
13 *DISCS*, we acquired new insights into scalability, design principles for proposal  
14 distributions, and lessons for adaptive sampling design. *DISCS* implements rep-  
15 resentative discrete samplers in existing research works as baselines, and offers a  
16 simple interface that researchers can conveniently design new discrete samplers  
17 and compare with baselines in a calibrated setup directly.

## 18 1 Introduction

19 Sampling in discrete spaces has been an important problem in physics (Edwards & Anderson,  
20 1975; Baumgärtner et al., 2012), statistics (Robert & Casella, 2013; Carpenter et al., 2017), and  
21 computer science (LeCun et al., 2006; Wang & Cho, 2019) for decades. Since sampling from a target  
22 distribution  $\pi(x) \propto \exp(-f(x))$  in a discrete space  $\mathcal{X}$  is typically intractable, one usually resorts  
23 to MCMC methods (Metropolis et al., 1953; Hastings, 1970). However, except for a few algorithms  
24 such as Swedese-Wang for the Ising model (Swendsen & Wang, 1987) and Hamze-Freitas for  
25 hierarchical models (Hamze & de Freitas, 2012), which exploit special structure of the underlying  
26 problem, sampling in a general discrete space has primarily relied on Gibbs sampling, which exhibits  
27 notoriously poor efficiency in high dimensional spaces.

28 Recently, a family of locally balanced samplers (Zanella, 2020; Grathwohl et al., 2021; Sun et al.,  
29 2021; Zhang et al., 2022), using ratio informed proposal distributions,  $\frac{\pi(y)}{\pi(x)}$ , have significantly  
30 improved sampling efficiency by exploiting modern accelerators like GPUs and TPUs. From the  
31 perspective of gradient flow on the Wasserstein manifold of distributions, Gibbs sampling is simply a  
32 coordinate descent algorithm, whereas locally balanced samplers perform as full gradient descent  
33 (Sun et al., 2022a). Despite the advances in locally balanced samplers, a quantitative benchmark

34 is still missing. One important reason is that there is no consensus on the experimental setting.  
35 Particularly, the initialization of energy based generative models, random seeds used in graphical  
36 models, and the protocol of hyper-parameter tuning all have a significant impact on performance.  
37 As a result, some empirical results in different research papers may not be comparable. Under this  
38 circumstance, a unified benchmark is in crucial need for boosting the research in discrete sampling.

39 There are two key challenges that seriously hinder the appearance of such a benchmark. First, a  
40 sampler may perform well in one target distribution while poorly in another one. To thoroughly  
41 examine the performance of a sampler, a qualified benchmark needs to collect a set of representative  
42 distributions that covers the potential applications of a discrete sampler. Second, the evaluation of  
43 discrete samplers is complicated. Although the commonly used metric ESS (Vehtari et al., 2021) can  
44 effectively reflect the efficiency of a sampler in Monte Carlo integration or Bayesian inference, it is  
45 not very informative in scenarios when the sampler guides the search in combinatorial optimization  
46 problems, or performs as a decoder in deep generative models.

47 To address the two challenges, we propose *DISCS*, a tailored benchmark for discrete sampling.  
48 In particular, *DISCS* consists of three groups of tasks: sampling from classical graphical models,  
49 sampling for solving combinatorial optimization problems, and sampling from deep EBMs. These  
50 tasks cover the topics of simulation and optimization, and models ranging from hand-designed  
51 graphical models to learned deep EBMs. For each task, we collect the representative problems from  
52 both synthetic and real-world applications, for example graph partitioning for distributed computing  
53 and language model for text generation. We carefully design the evaluation metrics in *DISCS*. In  
54 sampling classical graphical models tasks, *DISCS* uses the ESS as standard. In sampling for solving  
55 combinatorial optimization tasks, *DISCS* runs simulated annealing (Kirkpatrick et al., 1983) with  
56 multiple chains and report the average of the best results in each chain. In sampling from energy  
57 based generative models, *DISCS* employs domain specific ways to measure the sample quality.

58 *DISCS* offers a convenient interface for researchers to implement new discrete samplers, without  
59 worrying about parallelism, experiment loop and evaluation. *DISCS* can efficiently sweep over  
60 different tasks and configurations in parallel and thus the evaluation reported in this paper can be  
61 easily reproduced. Also, *DISCS* implements existing discrete samplers random walk Metropolis  
62 (Metropolis et al., 1953), block Gibbs, Hamming ball sampler (Titsias & Yau, 2017), LB (Zanella,  
63 2020), GWG (Grathwohl et al., 2021), PAS (Sun et al., 2021), DMALA (Zhang et al., 2022), DLMC  
64 (Sun et al., 2022a), and is actively maintaining to add new samplers. Researchers can directly compare  
65 the results with the state-of-the-art methods.

66 With *DISCS*, we observe an interesting phenomenon that the locally balanced weight function  
67  $g(t) = \sqrt{t}$  performs better (worse) than  $g(t) = \frac{t}{t+1}$  when Ising model has temperature higher (lower)  
68 than the critical temperature. There have been a lot of studies about how to select the locally balanced  
69 function for a locally balanced sampler (Zanella, 2020; Sansone, 2022), but the answer remains open.  
70 We hope the observations in this paper can provide some insight on this question.

71 We wrap the *DISCS* package as a JAX library to facilitate the research in discrete sampling. The  
72 library will be open sourced at <https://github.com/google-research/discs>. The paper is  
73 organized as follows:

- 74 • In section 2, we cover the related sampling tasks and discrete samplers.
- 75 • In section 3, we formulate the discrete sampling problem.
- 76 • In section 4, we introduce the discrete sampling tasks and evaluation metrics in *DISCS*. We also  
77 report the results for existing discrete samplers.
- 78 • In section 5, we discuss the contribution and limitations of *DISCS*.

## 79 2 Related Work

80 Discrete sampling has been widely used to study the physical picture of spin glasses (Hukushima &  
81 Nemoto, 1996; Katzgraber et al., 2001), solve combinatorial optimization via simulated annealing  
82 (Kirkpatrick et al., 1983), and for training or decoding deep energy based models (Wang & Cho, 2019;

83 Du et al., 2020; Dai et al., 2020b). However, they primarily depend on Gibbs sampling, which could  
 84 be very slow in high dimensional space.

85 Since the seminal work Zanella (2020), the recent years have witnessed significant progresses for  
 86 discrete sampling in the both theory and practice. Zanella (2020) introduces the locally balanced  
 87 proposal  $q(x, y) \propto g(\frac{\pi(y)}{\pi(x)})$ , where  $y \in N(x)$  restricted within a small neighborhood of  $x$  and  $g(\cdot) :$   
 88  $\mathbb{R}_+ \rightarrow \mathbb{R}_+$  satisfying  $g(a) = ag(\frac{1}{a})$ , and prove it is asymptotically optimal. In the following works,  
 89 PAS (Sun et al., 2021) and DMALA (Zhang et al., 2022) generalize locally balanced proposal to large  
 90 neighborhoods by introducing an auxiliary path and mimicking the diffusion process, respectively.  
 91 Inspired by these locally balanced samplers, Sun et al. (2022a) generalize the Langevin dynamics  
 92 in continuous space to *discrete Langevin dynamics* (DLD) in discrete space as a continuous time  
 93 Markov chain  $\frac{d}{dh}\mathbb{P}(X^{t+h} = y|X^t = x) = g(\frac{\pi(y)}{\pi(x)})$ , and show that previous locally balanced  
 94 samplers are simulations of DLD with different discretization strategies. In the view of Wasserstein  
 95 gradient flow, the Gibbs sampling can be seen as coordinate descent and DLD gives a full gradient  
 96 descent. Hence, locally balanced samplers induced from DLD provides a principled framework to  
 97 utilize the modern accelerators like GPUs and TPUs to accelerate discrete sampling. Besides the  
 98 discretization of DLD, another crucial part to design a locally balanced sampler is estimating the  
 99 probability ratio  $\frac{\pi(y)}{\pi(x)}$ . Grathwohl et al. (2021) proposes to used gradient approximation  $\frac{\pi(y)}{\pi(x)} \approx$   
 100  $\exp(-\langle \nabla f(x), y - x \rangle)$  and obtains good performance on various classical models and deep energy  
 101 based models. When the Hessian is available, Rhodes & Gutmann (2022); Sun et al. (2023a) use  
 102 second order approximation via Gaussian integral trick (Hubbard, 1959) to further improve the  
 103 sampling efficiency on skewed target distributions. When the gradient is not available, Xiang et al.  
 104 (2023) use zero order approximation via Newton’s series.

105 Besides designing the sampler, Sun et al. (2022b) proves that when tuning path length in PAS (Sun  
 106 et al., 2021), the optimal efficiency is obtained when average acceptance rate is 0.574, and design an  
 107 adaptive tuning algorithm for PAS. Sansone (2022) learn locally balanced weight function for locally  
 108 balanced proposal, but how to select the weight function in a principled manner is still unclear.

### 109 3 Formulation for Sampling in Discrete Space

110 The sampling in discrete space can be formulated as the following problem: in a finite discrete space  
 111  $\mathcal{X}$ , we have an energy function  $f(\cdot) : \mathcal{X} \rightarrow \mathbb{R}$ . We consider a target distribution

$$\pi(x) = \frac{\exp(-\beta f(x))}{Z}, \quad Z = \sum_{z \in \mathcal{X}} \exp(-\beta f(z)), \quad (1)$$

112 where  $\beta$  is the inverse temperature. When the normalizer  $Z$  is intractable, people usually resort to  
 113 Markov chain Monte Carlo (MCMC). Metropolis-Hastings (M-H) (Metropolis et al., 1953; Hastings,  
 114 1970) is a commonly used general purpose MCMC algorithm. Specifically, given a current state  $x^{(t)}$ ,  
 115 the M-H algorithm proposes a candidate state  $y$  from a proposal distribution  $q(x^{(t)}, y)$ . Then, with  
 116 probability

$$\min \left\{ 1, \frac{\pi(y)q(y, x^{(t)})}{\pi(x^{(t)})q(x^{(t)}, y)} \right\}, \quad (2)$$

117 the proposed state is accepted and  $x^{(t+1)} = y$ ; otherwise,  $x^{(t+1)} = x^{(t)}$ . In this way, the detailed  
 118 balance condition is satisfied and the M-H sampler generates a Markov chain  $x^{(0)}, x^{(1)}, \dots$  that has  $\pi$   
 119 as its stationary distribution.

### 120 4 Benchmark for Sampling in Discrete Space

121 The recent development of locally balanced samplers that use the ratio  $\frac{\pi(y)}{\pi(x)}$  to guide  $q(x, \cdot)$  have  
 122 significantly improved the sampling efficiency in discrete space. However, there is no consensus  
 123 for many experimental settings and the empirical results in different research papers may not be  
 124 comparable. Under this circumstance, we propose *DISCS* as a benchmark for general purpose

125 samplers in discrete space. In Section 4.1, we introduces the baselines in *DISDS*. In Section 4.2, 4.3,  
 126 4.4, we introduce the tasks considered in *DISCS* and how the discrete samplers are evaluated on these  
 127 tasks. We also report the results of the baselines.

## 128 4.1 Baselines

129 We include both classical discrete samplers and locally balanced samplers in recent research papers  
 130 as baselines in our benchmark. Specifically, *DISCS* implements

- 131 1. Random Walk Metropolis (RWM) (Metropolis et al., 1953).
- 132 2. Block Gibbs (BG), where BG- $\langle a \rangle$  denotes using block Gibbs with block size  $a$ .
- 133 3. Hamming Ball Sampler (HB) (Titsias & Yau, 2017), where HB- $\langle a \rangle$ - $\langle b \rangle$  denotes using block size  
 134  $a$  and Hamming ball size  $b$ .
- 135 4. Gibbs with Gradient (GWG) (Grathwohl et al., 2021), a locally balanced sampler that use gradient  
 136 to approximation the probability ratio. For binary distribution, GWG has a scaling factor  $L$  to  
 137 determine how many sites to flip per step.
- 138 5. Path Auxiliary Sampler (PAS) (Sun et al., 2021), a locally balanced sampler that has a scaling  
 139 factor  $L$  to determine the path length.
- 140 6. Discrete Metropolis Adjusted Langevin Algorithm (DMALA)(Zhang et al., 2022), a locally  
 141 balanced sampler that has a scaling factor  $\alpha$  to determine the step size.
- 142 7. Discrete Langevin Monte Carlo (DLMC) (Sun et al., 2022a), a locally balanced sampler that has  
 143 a scaling factor  $\tau$  to determine the simulation time of DLD. DLMC has multiple choices for its  
 144 numerical solver to approximate the transition matrix. *DISCS* considers the two versions used in  
 145 the original paper, DLMC that uses an interpolation and DLMCf that uses Euler’s forward method.

146 **Remark: weight function** All the locally balanced samplers have the flexibility to select locally  
 147 balanced function.  $g(t) = \sqrt{t}$  and  $g(t) = \frac{t}{t+1}$  are the two most commonly used weight functions. In  
 148 this paper, we will use  $\sqrt{t}$  by default. When we use both of them, we use  $\langle \text{sampler} \rangle$ - $\langle \text{func} \rangle$  to refer  
 149 the type of the weight function.

150 **Remark: scaling** Since the scalings of the proposal distribution in RWM, PAS, DMALA, and  
 151 DLMC are tunable, we considers two versions with adaptive tuning or binary search tuning for fair  
 152 comparison. Sun et al. (2022b, 2023b) propose adaptive tuning algorithm for PAS and DLMC when  
 153 the target distribution is factorized. In practice, we find that they also apply well for other locally  
 154 balanced samplers and for more general target distributions. Hence, in this paper, we use the adaptive  
 155 tuning algorithm by default to tune the scaling for locally balanced samplers. In the several exceptions  
 156 where the adaptive algorithm does not apply, we will use  $\langle \text{sampler-name} \rangle$ -noA to indicate the results  
 157 from binary search tuning.

## 158 4.2 Sampling from Classical Graphical Models

159 This section covers the classical graphical models that are widely used in physics and statistics,  
 160 including Bernoulli Models, Ising Models (Ising, 1924), and Factorial Hidden Markov Models  
 161 (Ghahramani & Jordan, 1995). The graphical models have large flexibility, for example, the number  
 162 of discrete variables, the number of categories for each discrete variable, and the temperature of the  
 163 model. The performances of different samplers can heavily depends on these configurations. *DISCS*  
 164 provides tools to automatically sweep over hundreds of configurations by one click. Same as the  
 165 routine in Monte Carlo integration or Bayesian inference, *DISCS* uses the Effective Sample Size  
 166 (ESS) to measure the efficiency for each sampler and reports the ESS normalized by the number of  
 167 calling energy function and the ESS normalized by the running time.

168 We use Ising Models as an example in the main text, and the more results are reported in Appendix.  
 169 For an Ising Model defined on a 2D grid, where the state space  $\mathcal{X} = \{-1, 1\}^{p \times p}$  represents the spins  
 170 on all nodes. For each state  $x \in \mathcal{X}$ , the energy function is defined as:

$$f(x) = - \sum_{i,j} J_{ij} x_i x_j - \sum_i h_i x_i \quad (3)$$

171 where  $J_{ij}$  is the internal interaction and the  $h_i$  is the external field. The configurations  $J$  and  $h$  can  
172 be set freely in *DISCS*. In the main text, we report the results using the configuration from Zanella  
173 (2020). Specifically,  $J_{ij} = 0.5$ ,  $h_i = \mu_i + \sigma_i$ , where  $\sigma_i \sim \text{Uniform}(-1.5, 1.5)$  and  $\mu_i = 0.5$  if node  
174  $i$  is located in a circle has the same center as the 2D grid and radius  $\frac{p}{2\sqrt{2}}$ , else  $-0.5$ . We consider the  
175 target distribution  $\pi(x) \propto \exp(-\beta f(x))$ , where  $\beta$  is the inverse temperature. Using *DISCS*, one can  
176 easily investigate the influence of the model dimension. In Figure 1, one can see that the traditional  
177 samplers, RWM, GB, HB, have significant decrease in ESS when the model dimension increases,  
178 while the locally balanced samplers are less affected as the ratio information  $\frac{\pi(y)}{\pi(x)}$  effectively guides  
179 the proposal distribution. The overall trends basically follows the prediction from Sun et al. (2022b)  
180 that the ESS is  $O(d^{-1})$  for RWM and  $O(d^{-\frac{1}{3}})$  for PAS.

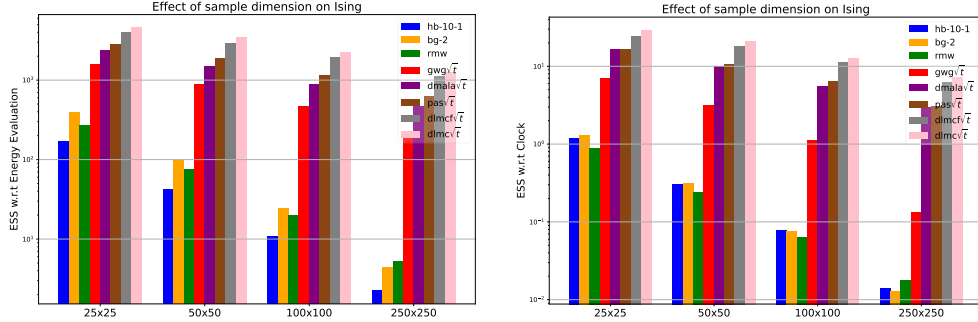

Figure 1: Results on Ising model with different dimensions

181 Through *DISCS*, researchers can also easily evaluate the samplers with different temperature. In  
182 Figure 2, we evaluate Ising models with inverse temperatures from 0.1607 to 0.7607. We consider  
183 Ising model without external field:  $h_i \equiv 0$  and  $J_{ij} \equiv 1$  as we know the critical point for this  
184 configuration is  $\frac{2}{\log(1+\sqrt{2})}$  which means the critical point for inverse temperature  $\beta = 0.4407$ . From  
185 the results, we can see that

- 186 • The Ising model is harder to sample from when the inverse temperature  $\beta$  is closer to the critical
- 187 point, which is consistent with the theory in statistical physics
- 188 • When the inverse temperature  $\beta$  is lower than the critical point, using weight function  $g(t) = \sqrt{t}$
- 189 gives larger ESS; When the inverse temperature is larger than the critical point, using weight
- 190 function  $g(t) = \frac{t}{t+1}$  consistently obtains larger ESS.

191 The second observation implies that one should use ratio function  $\frac{t}{t+1}$  for target distributions with  
192 sharp landscapes. We will revisit this conclusion in Figure 5 and Table 2.

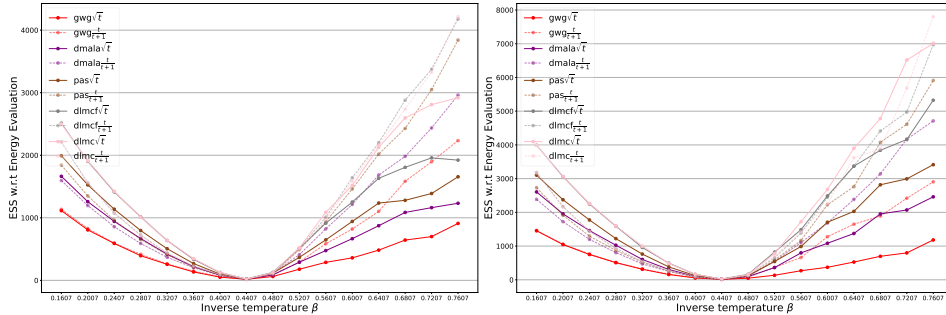

Figure 2: Performance of locally balanced samplers with different types of weight functions v.s temperature on: (left)  $50 \times 50$  Ising model, (right)  $100 \times 100$  Ising model

193 The categorical version of Ising model is Potts model, where each site of a state  $x_i$  has values in a  
194 symmetry group, instead of  $\{-1, 1\}$ . For simplicity, we denote the symmetry group as a set of one

195 hot vectors  $\mathcal{C} = \{e_1, \dots, e_c\}$  with  $h_i \in \mathbb{R}^C$ ,  $J_{ij} \in \mathbb{R}^{C \times C}$ . In this way, the energy function becomes:

$$f(x) = - \sum_{i,j} x_i^\top J_{ij} x_j - \sum_i \langle h_i, x_i \rangle \quad (4)$$

196 In Figure 3, one can see the sampling efficiency is very robust with respect to the number of category. The result for BG-2 on Potts model with 256 categories are omitted as it takes over 100 hours.

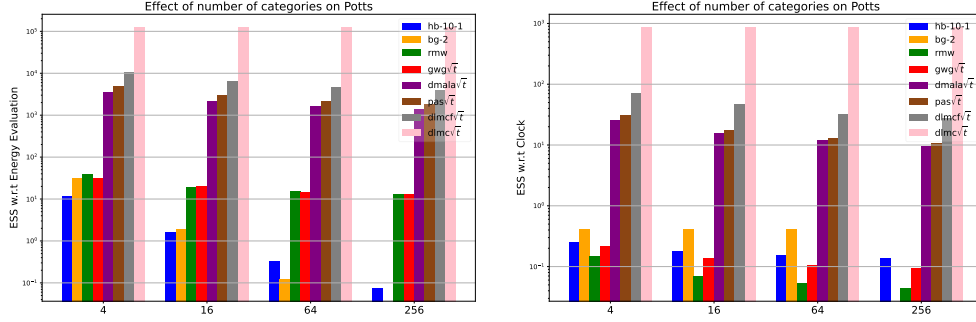

Figure 3: Results of Potts models with different number of categories

197

### 198 4.3 Sampling for Solving Combinatorial Optimization

199 Combinatorial optimization is a core challenge in domains like logistics, supply chain management  
 200 and hardware design, and has been a fundamental problem of study in computer science for decades.  
 201 Combining with simulated annealing Kirkpatrick et al. (1983), discrete sampling algorithm is a  
 202 powerful tool to solve combinatorial optimization problems (Sun et al., 2023b). In expectation, a  
 203 sampler with a faster mixing rate can find better solutions. Hence, the second type of tasks is sampling  
 204 for solving combinatorial optimization problems. Currently, *DISCS* covers four problems: Maximum  
 205 Independent Set, Max Clique, Max Cut, and Balanced Graph Partition. Without loss of generality,  
 206 we consider combinatorial optimization that admit the following form:

$$\min_{x \in \mathcal{C} = \{0,1,\dots,C-1\}^d} a(x), \quad \text{s.t.} \quad b(x) = 0 \quad (5)$$

207 For ease of exposition, we also assume  $b(x) \geq 0, \forall x \in \mathcal{C}$ , but otherwise do not limit the form of  $a$   
 208 and  $b$ . To convert the optimization problem to a sampling problem, we first rewrite the constrained  
 209 optimization into a penalty form via a penalty coefficient  $\lambda$ , then treat this as an energy function for  
 210 an EBM. In particular, the energy function takes the form:

$$f(x) = a(x) + \lambda \cdot b(x) \quad (6)$$

211 Then, we define the probability of  $x$  at inverse temperature  $\beta$  by:

$$p_\beta(x) \propto \exp(-\beta f(x)) \quad (7)$$

212 A naive approach to this problem would be directly sampling from  $p_{\beta \rightarrow \infty}(x)$ , but such a distribution  
 213 is highly nonsmooth and unsuitable for MCMC methods. Instead, following classical simulated an-  
 214 nealing, we define a sequence of distributions parameterized by a sequence of decaying temperatures:

$$\mathcal{P} = [p_{\beta_0}(x), p_{\beta_1}(x), \dots, p_{\beta_T}(x)] \quad (8)$$

215 where the sequence  $\beta_0 < \beta_1 < \dots < \beta_T \rightarrow \infty$  converges to a large enough value as  $T$  increases.

216 **Example 1: Max Cut** A cut on a graph  $G = (V, E)$  is to find a partition of the graph nodes into two  
 217 complementary sets  $V = V_1 \cup V_2$ , such that the number of edges in  $E$  between  $V_1$  and  $V_2$  is as large  
 218 as possible. Max Cut is an unconstrained problem, which makes its formulation relatively simple.  
 219 We can set  $\mathcal{C} = \{0, 1\}$  such that  $x_i = 0$  represents  $i \in V_1$  and  $x_i = 1$  means  $x_i \in V_2$ . Then we  
 220 can write  $a(x) = -x^\top A x, b(x) \equiv 0$ , where  $A$  is the adjacency matrix of  $G$ . By applying simulated

221 annealing with the same temperature schedule, we can compare the performance for each sampler.  
 222 We report the results in Figure 4. The ratio is computed by dividing the cut size for the solutions  
 223 obtained by running Gurobi for one hour (Dai et al., 2020a). The legends are sorted according to the  
 224 optimal value they find. One can see that the PAS leads the results. Also, locally balanced samplers  
 significantly outperforms the traditional samplers, especially when the graph size increases.

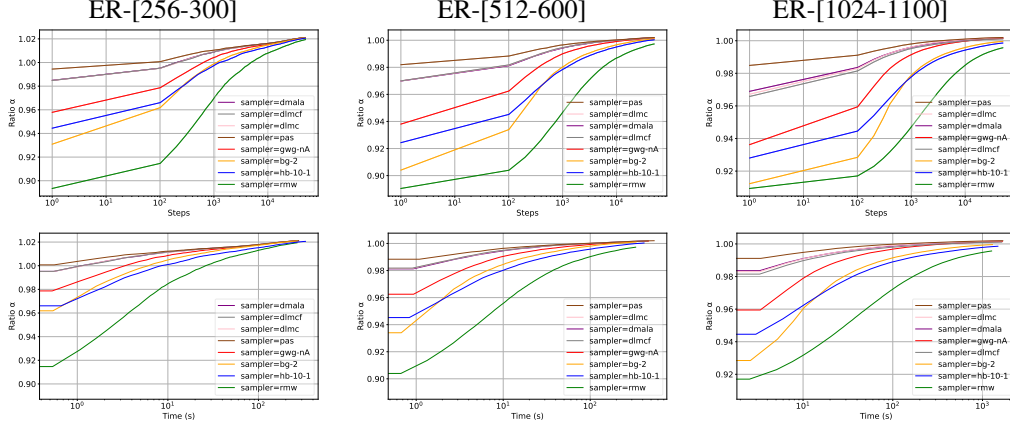

Figure 4: Results for MAXCUT on ER graphs. The ratio is computed by dividing the optimal cut size obtained from running Gurobi for 1 hour. (top) ratio with respect to number of M-H steps, (bottom) ratio with respect to running time.

225

226 **Example 2: Maximum Independent Set** On a graph  $G = (V, E)$ , an independent set  $S \subset V$   
 227 means that for any  $i, j \in S$ ,  $(i, j) \notin E$ . We can set  $\mathcal{C} = \{0, 1\}$  such that  $x_i = 0$  means  $i \notin S$  and  
 228  $x_i = 1$  means  $i \in S$ . Then we can write  $a(x) = -\sum_{i \in V} x_i$  and  $b(x) = \sum_{(i,j) \in E} x_i x_j$ . For the  
 229 penalty coefficient  $\lambda$ , we follow Sun et al. (2022c) to select  $\lambda = 1.0001$  being a value slightly larger  
 230 than 1. We run all samplers on five groups of small ER graphs with 700 to 800 nodes, each group has  
 231 128 graphs with densities varying 0.05, 0.10, 0.15, 0.20, and 0.25. We also run all samplers on 16  
 232 large ER graphs with 9000 to 11000 nodes. For each configurations, we run 32 chains with the same  
 233 running time and report the average of the best results found by each chain in Table 1. One can easily  
 234 see that PAS obtains the best result.

Table 1: Results for MIS on ER graphs. The set found by sampling algorithm is not necessary an independent set, we report a lower bound: set size - # pair of adjacent nodes in the set.

| Sampler | ER[700-800]    |               |               |               |               | ER[9000-11000] |
|---------|----------------|---------------|---------------|---------------|---------------|----------------|
|         | 0.05           | 0.10          | 0.15          | 0.20          | 0.25          | 0.15           |
| HB-10-1 | 100.374        | 58.750        | 41.812        | 32.344        | 26.469        | 277.149        |
| BG-2    | 102.468        | 60.000        | 42.820        | 32.250        | 27.312        | 316.170        |
| RMW     | 97.186         | 56.249        | 40.429        | 31.219        | 25.594        | -555.674       |
| GWG-na  | 104.812        | 62.125        | 44.383        | <b>34.812</b> | 28.187        | 367.310        |
| DMALA   | 104.750        | 62.031        | 44.195        | 34.375        | 28.031        | 357.058        |
| PAS     | <b>105.062</b> | <b>62.250</b> | <b>44.570</b> | 34.719        | <b>28.500</b> | <b>377.123</b> |
| DLMCf   | 104.450        | 62.219        | 44.078        | 34.469        | 28.125        | 354.121        |
| DLMC    | 104.844        | 62.187        | 44.273        | 34.500        | 28.281        | 355.058        |

#### 235 4.4 Sampling from Energy Based Generative Models

236 The discrete samplers can also play as the decoder in generative models. In particular, given a  
 237 dataset  $\mathcal{D} = \{X_i\}_{i=1}^N$  sampled from the target distribution  $\pi$ , one can train an energy function  $f_\theta(\cdot)$ ,  
 238 such that the energy based model  $\pi_\theta(\cdot) \propto \exp(-f_\theta(\cdot))$  fits the dataset  $\mathcal{D}$ . DISCS provides multiple  
 239 checkpoints for the energy function trained on real-world image or language datasets. Researchers  
 240 can easily evaluate their samplers after loading the learned energy function.

241 For the models that are relatively simple, for example, Restricted Boltzmann Machine (RBM) trained  
 242 on MNIST (LeCun, 1998) and fashion-MNIST (Xiao et al., 2017b), one can continue using ESS  
 243 as the metric. In Figure 5, we evaluate the samplers on RBMs trained on MNIST with 25 and 200  
 244 hidden variables. One can see that 1) DLMC has the best performance, 2) when the hidden dimension  
 245 is larger, the learned distribution becomes sharper, hence  $\frac{t}{t+1}$  obtains better efficiency compared to  
 246  $\sqrt{t}$ , which is consistent with our observation in Figure 2. For more complicated deep energy based  
 247 models, a sampler may fail to mix within a reasonable steps. In this case, ESS is not a good metric.  
 248 To address this problem, *DISCS* provides multiple alternative measurements, including snapshots,  
 249 annealed importance sampling, and domain specific scores.

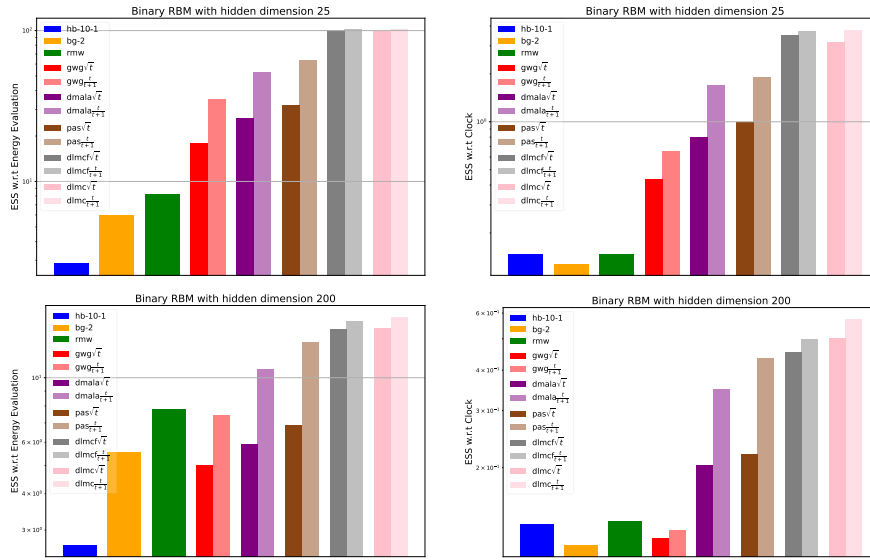

Figure 5: Results on RBMs trained on MNIST dataset. (top) RBM with 25 binary hidden variables, (bottom) RBM with 200 binary hidden variables

250 **Snapshots** After loading the checkpoint of energy based generative models, *DISCS* can generate  
 251 snapshots of the sampling chains. For example, in Figure 6, we display the snapshots of sampling on  
 252 a deep residual network trained on MNIST data (Sun et al., 2021) and on pretrained language model  
 253 BERT<sup>1</sup>. One can see that locally balanced samplers generates samples with higher qualities, and can  
 254 typically visit multiple modalities in the distribution.

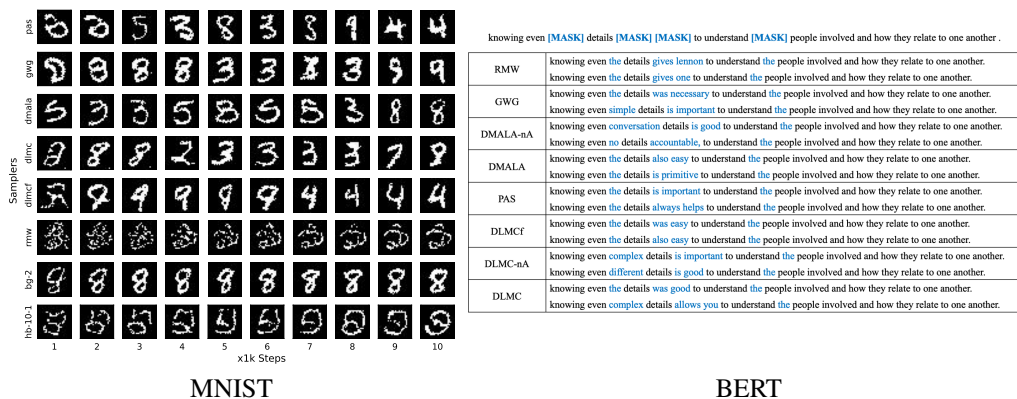

Figure 6: Snapshots of energy based generative models: (left) snapshots for every 1k steps on MNIST ResNet, (right) snapshots for text filling task on BERT in Table 2

<sup>1</sup>loading the check point from <https://huggingface.co/bert-base-uncased>.



255 **Domain Specific Scores** In many deep generative tasks, the goal is to efficiently sample high-quality  
 256 samples, instead of mixing in the learned energy based models. In this scenario, domain specific  
 257 scores that directly evaluate the sample qualities are a better choice. For example, *DISCS* provides  
 258 text filling tasks based on pre-trained language models like BERT (Wang & Cho, 2019; Devlin  
 259 et al., 2018). Following the settings in prior work (Zhang et al., 2022), *DISCS* randomly sample 20  
 260 sentences from TBC (Zhu et al., 2015) and WikiText-103 (Merity et al., 2016), mask four words in  
 261 each sentence (Donahue et al., 2020), and sample 25 sentences from the probability distribution given  
 262 by BERT. As a common practice in non-auto-regressive text generation, we select the top-5 sentences  
 263 with the highest likelihood out of 25 sentences to avoid low-quality generation (Gu et al., 2017; Zhou  
 264 et al., 2019). We evaluate the generated samples in terms of diversity and quality. For diversity,  
 265 we use self-BLEU (Zhu et al., 2018) and the number of unique n-grams (Wang & Cho, 2019) to  
 266 measure the difference between the generated sentences. For quality, we measure the BLEU score  
 267 (Papineni et al., 2002) between the generated texts and the original dataset, which is the combination  
 268 of TBC and WikiText-103. We report the quantitative results in Table 2. We do not have the results  
 269 for HB and BG as they are computationally infeasible for this task with 30k+ tokens. In this task,  
 270 the locally balanced sampler still outperforms RMW. Also, one can notice that the weight function  
 271  $\frac{t}{t+1}$  significantly outperforms  $\sqrt{t}$ . The reason is that the overparameterized neural network is a low  
 272 temperature system with sharp landscape. This phenomenon is consistent with the results in Figure 2.

Table 2: Quantative results on text infilling. The reference text for computing the Corpus BLEU is the combination of WT103 and TBC.

| Methods               | Self-BLEU ( $\downarrow$ ) | Unique $n$ -grams (%) ( $\uparrow$ ) |              |              |              |              |              | Corpus BLEU ( $\uparrow$ ) |
|-----------------------|----------------------------|--------------------------------------|--------------|--------------|--------------|--------------|--------------|----------------------------|
|                       |                            | Self                                 |              | WT103        |              | TBC          |              |                            |
|                       |                            | $n = 2$                              | $n = 3$      | $n = 2$      | $n = 3$      | $n = 2$      | $n = 3$      |                            |
| RMW                   | 92.41                      | 6.26                                 | 9.10         | 18.97        | 26.73        | 19.33        | 26.67        | 16.24                      |
| GWG $\sqrt{t}$        | 85.93                      | 11.22                                | 17.14        | 23.16        | 35.56        | 23.58        | 35.56        | 16.75                      |
| DMALA $\sqrt{t}$      | 85.88                      | 11.58                                | 17.14        | 22.07        | 34.08        | 23.22        | 34.15        | <b>17.06</b>               |
| PAS $\sqrt{t}$        | 85.39                      | 11.37                                | 17.60        | 22.61        | 35.53        | 23.65        | 35.47        | 16.57                      |
| DLMCf $\sqrt{t}$      | 88.39                      | 9.53                                 | 14.06        | 21.00        | 31.85        | 22.27        | 31.98        | 16.70                      |
| DLMC $\sqrt{t}$       | 85.28                      | 12.05                                | 17.65        | 24.03        | 36.34        | 24.51        | 36.27        | 16.45                      |
| GWG $\frac{t}{t+1}$   | 81.15                      | 15.47                                | 22.70        | <b>25.62</b> | 38.91        | 25.62        | 38.58        | 16.68                      |
| DMALA $\frac{t}{t+1}$ | 80.21                      | <b>16.36</b>                         | 23.71        | 25.60        | <b>39.39</b> | 26.75        | <b>39.72</b> | 16.53                      |
| PAS $\frac{t}{t+1}$   | 81.02                      | 15.62                                | 22.65        | 25.59        | 39.28        | 26.08        | 39.48        | 16.69                      |
| DLMCf $\frac{t}{t+1}$ | <b>80.12</b>               | 16.25                                | <b>23.76</b> | 25.41        | 39.31        | <b>26.86</b> | 39.57        | 16.73                      |
| DLMC $\frac{t}{t+1}$  | 84.55                      | 12.62                                | 18.47        | 24.27        | 37.28        | 24.94        | 37.14        | 16.69                      |

## 273 5 Conclusion

274 *DISCS* is a tailored benchmark for discrete sampling. It implements various discrete sampling tasks  
 275 and state-of-the-art discrete samplers and enables a fair comparison. From the results, we know  
 276 that DLMC leads in sampling from classical graphical models, PAS leads in solving combinatorial  
 277 optimization problems, DLMCf and DMALA has the best performance on language models. We  
 278 believe more efficient discrete samplers can be obtained by designing better discretization of DLD  
 279 (Sun et al., 2022a). *DISCS* is a convenient tools during this process. The researcher can freely set the  
 280 configurations for tasks and samplers and *DISCS* will automatically compile the program and run the  
 281 processes in parallel. Besides, we observe that the choice of the locally balanced weight function  
 282 should depends on the critical temperature of the target distribution. We believe this observation is  
 283 insightful and will lead to a deeper understanding of locally balanced samplers.

284 Of course, *DISCS* does not include all existing tasks or samplers in discrete sampling, for example,  
 285 the zero order (Xiang et al., 2023) and second order (Sun et al., 2023a) approximation methods. We  
 286 will keep iterating *DISCS* and more features will be added in the future. We wrap *DISCS* to a JAX  
 287 library. Researchers can conveniently implement customer tasks or samplers to accelerate their study  
 288 and, in the meanwhile, contribute the code to *DISCS* for further improvement. We believe *DISCS*  
 289 will be a powerful tools for researchers and facilitate the future research in discrete sampling.

## 290 References

- 291 Baumgärtner, A., Burkitt, A., Ceperley, D., De Raedt, H., Ferrenberg, A., Heermann, D., Herrmann,  
292 H., Landau, D., Levesque, D., von der Linden, W., et al. *The Monte Carlo method in condensed*  
293 *matter physics*, volume 71. Springer Science & Business Media, 2012.
- 294 Carpenter, B., Gelman, A., Hoffman, M. D., Lee, D., Goodrich, B., Betancourt, M., Brubaker, M.,  
295 Guo, J., Li, P., and Riddell, A. Stan: A probabilistic programming language. *Journal of statistical*  
296 *software*, 76(1), 2017.
- 297 Dai, H., Chen, X., Li, Y., Gao, X., and Song, L. A framework for differentiable discovery of graph  
298 algorithms. 2020a.
- 299 Dai, H., Singh, R., Dai, B., Sutton, C., and Schuurmans, D. Learning discrete energy-based models  
300 via auxiliary-variable local exploration. *arXiv preprint arXiv:2011.05363*, 2020b.
- 301 Devlin, J., Chang, M.-W., Lee, K., and Toutanova, K. Bert: Pre-training of deep bidirectional  
302 transformers for language understanding. *arXiv preprint arXiv:1810.04805*, 2018.
- 303 Donahue, C., Lee, M., and Liang, P. Enabling language models to fill in the blanks. *arXiv preprint*  
304 *arXiv:2005.05339*, 2020.
- 305 Du, Y., Li, S., Tenenbaum, J., and Mordatch, I. Improved contrastive divergence training of energy  
306 based models. *arXiv preprint arXiv:2012.01316*, 2020.
- 307 Edwards, S. F. and Anderson, P. W. Theory of spin glasses. *Journal of Physics F: Metal Physics*, 5  
308 (5):965, 1975.
- 309 Ghahramani, Z. and Jordan, M. Factorial hidden markov models. *Advances in Neural Information*  
310 *Processing Systems*, 8, 1995.
- 311 Grathwohl, W., Swersky, K., Hashemi, M., Duvenaud, D., and Maddison, C. J. Oops I took a gradient:  
312 Scalable sampling for discrete distributions. *arXiv preprint arXiv:2102.04509*, 2021.
- 313 Gu, J., Bradbury, J., Xiong, C., Li, V. O., and Socher, R. Non-autoregressive neural machine  
314 translation. *arXiv preprint arXiv:1711.02281*, 2017.
- 315 Hamze, F. and de Freitas, N. From fields to trees. *arXiv preprint arXiv:1207.4149*, 2012.
- 316 Hastings, W. K. Monte Carlo sampling methods using Markov chains and their applications. 1970.
- 317 Hinton, G. E. Training products of experts by minimizing contrastive divergence. *Neural computation*,  
318 14(8):1771–1800, 2002.
- 319 Hubbard, J. Calculation of partition functions. *Physical Review Letters*, 3(2):77, 1959.
- 320 Hukushima, K. and Nemoto, K. Exchange monte carlo method and application to spin glass  
321 simulations. *Journal of the Physical Society of Japan*, 65(6):1604–1608, 1996.
- 322 Ising, E. *Beitrag zur theorie des ferro-und paramagnetismus*. PhD thesis, Grefe & Tiedemann, 1924.
- 323 Katzgraber, H. G., Palassini, M., and Young, A. Monte carlo simulations of spin glasses at low  
324 temperatures. *Physical Review B*, 63(18):184422, 2001.
- 325 Kirkpatrick, S., Gelatt Jr, C. D., and Vecchi, M. P. Optimization by simulated annealing. *science*, 220  
326 (4598):671–680, 1983.
- 327 LeCun, Y. The mnist database of handwritten digits. <http://yann.lecun.com/exdb/mnist/>, 1998.
- 328 LeCun, Y., Chopra, S., Hadsell, R., Ranzato, M., and Huang, F. A tutorial on energy-based learning.  
329 *Predicting structured data*, 1(0), 2006.

- 330 Merity, S., Xiong, C., Bradbury, J., and Socher, R. Pointer sentinel mixture models. *arXiv preprint*  
331 *arXiv:1609.07843*, 2016.
- 332 Metropolis, N., Rosenbluth, A. W., Rosenbluth, M. N., Teller, A. H., and Teller, E. Equation of  
333 state calculations by fast computing machines. *The journal of chemical physics*, 21(6):1087–1092,  
334 1953.
- 335 Papineni, K., Roukos, S., Ward, T., and Zhu, W.-J. Bleu: a method for automatic evaluation of machine  
336 translation. In *Proceedings of the 40th annual meeting of the Association for Computational*  
337 *Linguistics*, pp. 311–318, 2002.
- 338 Potts, R. B. Some generalized order-disorder transformations. In *Mathematical proceedings of the*  
339 *cambridge philosophical society*, volume 48, pp. 106–109. Cambridge University Press, 1952.
- 340 Rhodes, B. and Gutmann, M. Enhanced gradient-based mcmc in discrete spaces. *arXiv preprint*  
341 *arXiv:2208.00040*, 2022.
- 342 Robert, C. and Casella, G. *Monte Carlo statistical methods*. Springer Science & Business Media,  
343 2013.
- 344 Sansone, E. Lsb: Local self-balancing mcmc in discrete spaces. In *International Conference on*  
345 *Machine Learning*, pp. 19205–19220. PMLR, 2022.
- 346 Sun, H., Dai, H., Xia, W., and Ramamurthy, A. Path auxiliary proposal for MCMC in discrete space.  
347 In *International Conference on Learning Representations*, 2021.
- 348 Sun, H., Dai, H., Dai, B., Zhou, H., and Schuurmans, D. Discrete Langevin sampler via Wasserstein  
349 gradient flow. *arXiv preprint arXiv:2206.14897*, 2022a.
- 350 Sun, H., Dai, H., and Schuurmans, D. Optimal scaling for locally balanced proposals in discrete  
351 spaces. *arXiv preprint arXiv:2209.08183*, 2022b.
- 352 Sun, H., Guha, E. K., and Dai, H. Annealed training for combinatorial optimization on graphs. *arXiv*  
353 *preprint arXiv:2207.11542*, 2022c.
- 354 Sun, H., Dai, B., Sutton, C., Schuurmans, D., and Dai, H. Any-scale balanced samplers for discrete  
355 space. In *The Eleventh International Conference on Learning Representations*, 2023a.
- 356 Sun, H., Goshvadi, K., Nova, A., Schuurmans, D., and Dai, H. Revisiting sampling for combinatorial  
357 optimization. In *International Conference on Machine Learning*, pp. 19205–19220. PMLR, 2023b.
- 358 Swendsen, R. H. and Wang, J.-S. Nonuniversal critical dynamics in Monte Carlo simulations.  
359 *Physical review letters*, 58(2):86, 1987.
- 360 Titsias, M. K. and Yau, C. The Hamming ball sampler. *Journal of the American Statistical Association*,  
361 112(520):1598–1611, 2017.
- 362 Tran, T., Phung, D., and Venkatesh, S. Mixed-variate restricted boltzmann machines. In *Asian*  
363 *conference on machine learning*, pp. 213–229. PMLR, 2011.
- 364 Vehtari, A., Gelman, A., Simpson, D., Carpenter, B., and Bürkner, P.-C. Rank-normalization, folding,  
365 and localization: An improved r for assessing convergence of mcmc (with discussion). *Bayesian*  
366 *analysis*, 16(2):667–718, 2021.
- 367 Wang, A. and Cho, K. Bert has a mouth, and it must speak: Bert as a markov random field language  
368 model. *arXiv preprint arXiv:1902.04094*, 2019.
- 369 Xiang, Y., Zhu, D., Lei, B., Xu, D., and Zhang, R. Efficient informed proposals for discrete distribu-  
370 tions via newton’s series approximation. In *International Conference on Artificial Intelligence and*  
371 *Statistics*, pp. 7288–7310. PMLR, 2023.

- 372 Xiao, H., Rasul, K., and Vollgraf, R. Fashion-mnist: a novel image dataset for benchmarking machine  
373 learning algorithms, 2017a.
- 374 Xiao, H., Rasul, K., and Vollgraf, R. Fashion-mnist: a novel image dataset for benchmarking machine  
375 learning algorithms. *arXiv preprint arXiv:1708.07747*, 2017b.
- 376 Zanella, G. Informed proposals for local MCMC in discrete spaces. *Journal of the American*  
377 *Statistical Association*, 115(530):852–865, 2020.
- 378 Zhang, R., Liu, X., and Liu, Q. A Langevin-like sampler for discrete distributions. In *International*  
379 *Conference on Machine Learning*, pp. 26375–26396. PMLR, 2022.
- 380 Zhou, C., Neubig, G., and Gu, J. Understanding knowledge distillation in non-autoregressive machine  
381 translation. *arXiv preprint arXiv:1911.02727*, 2019.
- 382 Zhu, Y., Kiros, R., Zemel, R., Salakhutdinov, R., Urtasun, R., Torralba, A., and Fidler, S. Aligning  
383 books and movies: Towards story-like visual explanations by watching movies and reading books.  
384 In *Proceedings of the IEEE international conference on computer vision*, pp. 19–27, 2015.
- 385 Zhu, Y., Lu, S., Zheng, L., Guo, J., Zhang, W., Wang, J., and Yu, Y. Taxygen: A benchmarking  
386 platform for text generation models. In *The 41st international ACM SIGIR conference on research*  
387 *& development in information retrieval*, pp. 1097–1100, 2018.

388 **A Experiment Details**

389 The source code is open source at DISCS and the data used in this paper is available at DISCS DATA.

390 **A.1 Classical Graphical Models**

391 For all the experiments of classical graphical models, we run 100 chains. The chains are run in  
 392 parallel on 4 V100 GPUs, with each GPU handling a mini batch of 25 chains. We evaluate the  
 393 performance of all the samplers and study the effect of sample shape, number of categories, locally  
 394 balance function type for locally balanced samplers and the smoothness/sharpness of different models.  
 395 Note that the result for BG-2 on Potts 10 and Categorical 8 model with 256 categories are omitted as  
 396 it takes over 100 hours. The chain length is set as 1 million steps when studying the effect of number  
 397 of categories and sample shape and in the other cases is set as 100k steps. For each experiment, as  
 398 the sampling happens, all the samples of all chains are mapped separately on a randomly generated  
 399 sample to a lower dimension of one. The ESS is calculated on the mapped samples after the burn-in  
 400 phase i.e. after the generation of half of the chain using TensorFlow MCMC effective sample size.  
 401 The ESS is averaged over all the chains and is reported over the running time and number of energy  
 402 evaluation of each sampler. In the following sections, we provide the energy function we used for  
 403 each of the classical graphical models.

404 **A.1.1 Factorized Models**

405 Factorized models are the simplest distributions in a discrete space, where each site is independent  
 406 with others. Consider the category set of one hot vectors  $\mathcal{C} = \{e_1, \dots, e_C\}$  and the state space  
 407  $\mathcal{X} = \mathcal{C}^N$ . We have  $|\mathcal{C}| = C$  is the number of category and  $N$  is the number of variables. The energy  
 408 function of a factorized model is:

$$f(x) = \sum_{n=1}^N \langle x_n, \theta^n \rangle \tag{9}$$

409 where  $\theta^d \in \mathbb{R}^C$ . We denote the target distribution as Bernoulli model when  $C = 2$  and Categorical  
 410 model when  $C > 2$ . We report the results on Bernoulli models and Categorical models in Figure 7  
 411 and 8, respectively.

412 **A.1.2 Ising Models**

413 The Ising model (Ising, 1924) is a mathematical model of ferromagnetism in statistical mechanics.  
 414 It consists of binary random variables arranged in a lattice graph  $G = (V, E)$  and allows node to  
 415 interact with its neighbors. The Potts model (Potts, 1952) is a generalization of the Ising model where  
 416 the random variables are categorical. The energy function for Ising model and Potts model can be  
 417 described as:

$$f(x) = - \sum_{n=1}^N \langle x_n, \theta_n \rangle - \sum_{(i,j) \in E} J_{ij}(x_i, x_j) \tag{10}$$

418 where we set  $\theta^d \in \mathbb{R}^n$ , and  $J_{ij}(x_i, y_j) = 1_{\{x_i=y_j\}}$ . For Ising model, we use  $\theta^n \sim \text{Uniform}(-2, 1)$   
 419 for the outer part of the lattice graph, and  $\theta^n \sim \text{Uniform}(-1, 2)$  for the inner part of the lattice graph.  
 420 We report the results on Ising model and Potts model in Figure 9, 10.

421 **A.1.3 Factorial Hidden Markov Model**

422 FHMM (Ghahramani & Jordan, 1995) uses latent variables to characterize time series data. In  
 423 particular, it assumes the continuous data  $y \in \mathbb{R}^L$  is generated by hidden state  $x \in \mathcal{C}^{L \times K}$ . The  
 424 probability function is:

$$p(x) = p(x_1) \prod_{l=2}^L p(x^l | x^{l-1}), \quad p(y|x) = \prod_{l=1}^L \mathcal{N}(y_l; \sum_{k=1}^K \langle W_k, x_{l,k} \rangle + b; \sigma^2) \tag{11}$$

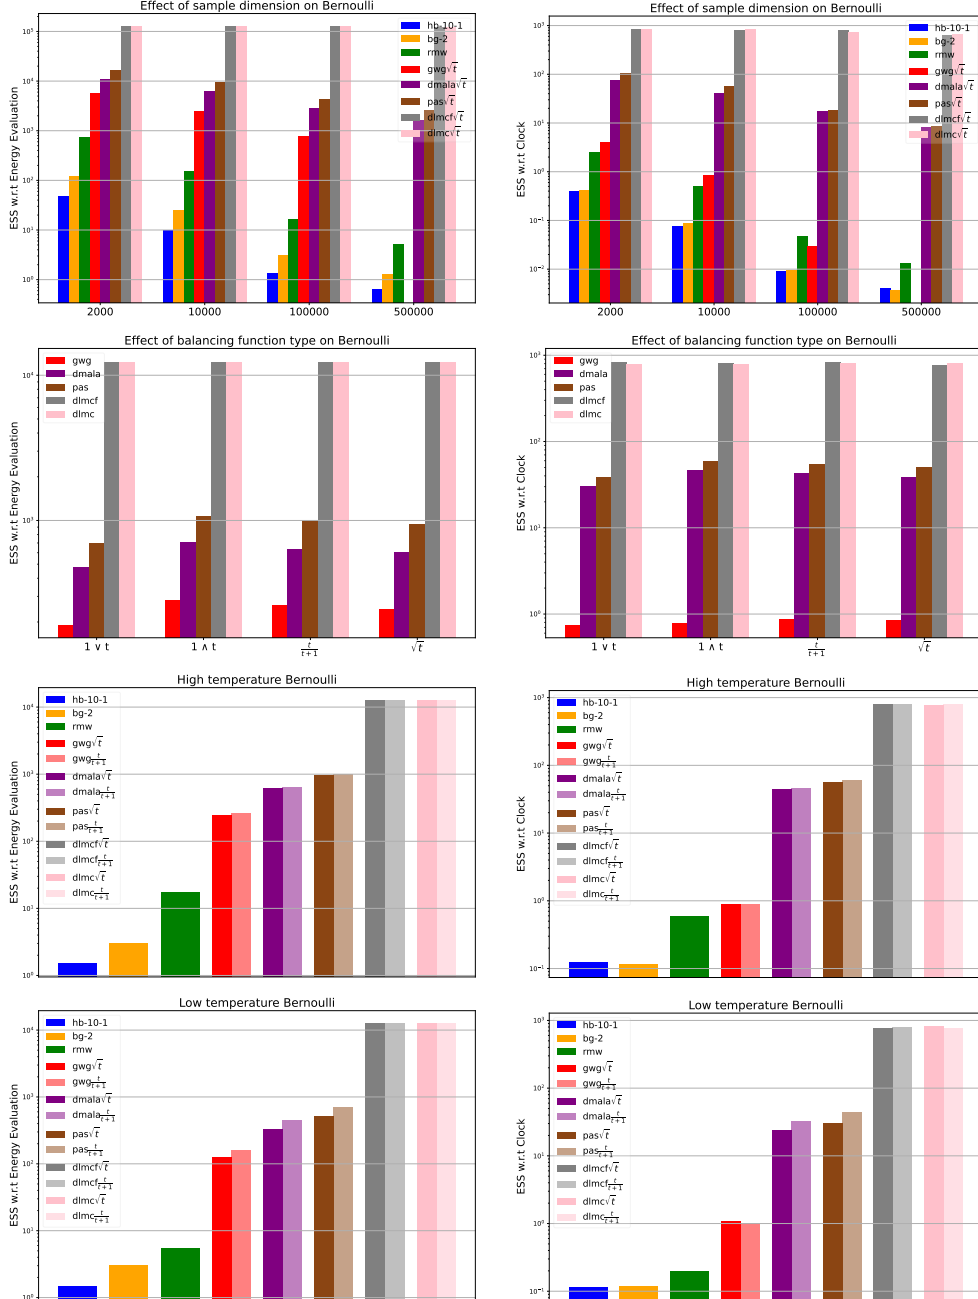

Figure 7: Results on Bernoulli Models

425 In particular, for binary model, we consider  $\mathbb{P}(x_1 = 0) = 0.9, \mathbb{P}(x^t = x^{t-1}|x^{t-1}) = 0.8, \sigma = 2.0$ .  
 426 We use  $L = 200, K = 50$  for high temperature setting and  $L = 1000, K = 10$  in low temperature  
 427 setting. For categorical model, we use  $p(x_1|x_1 \neq 0)$  and  $p(x^t|x^{t-1}, x^t \neq x^{t-1})$  as uniform  
 428 distribution and we use  $L = 200, K = 10$  with category number  $C = 4, 8$ . We report the results in  
 429 Figure 11.

## 430 A.2 Combinatorial Optimization

431 Here we first provide the experimental details for the combinatorial optimization problems, MIS,  
 432 Max Clique, Maxcut and, Balanced Graph Partition. The statistics of the synthetic datasets, including

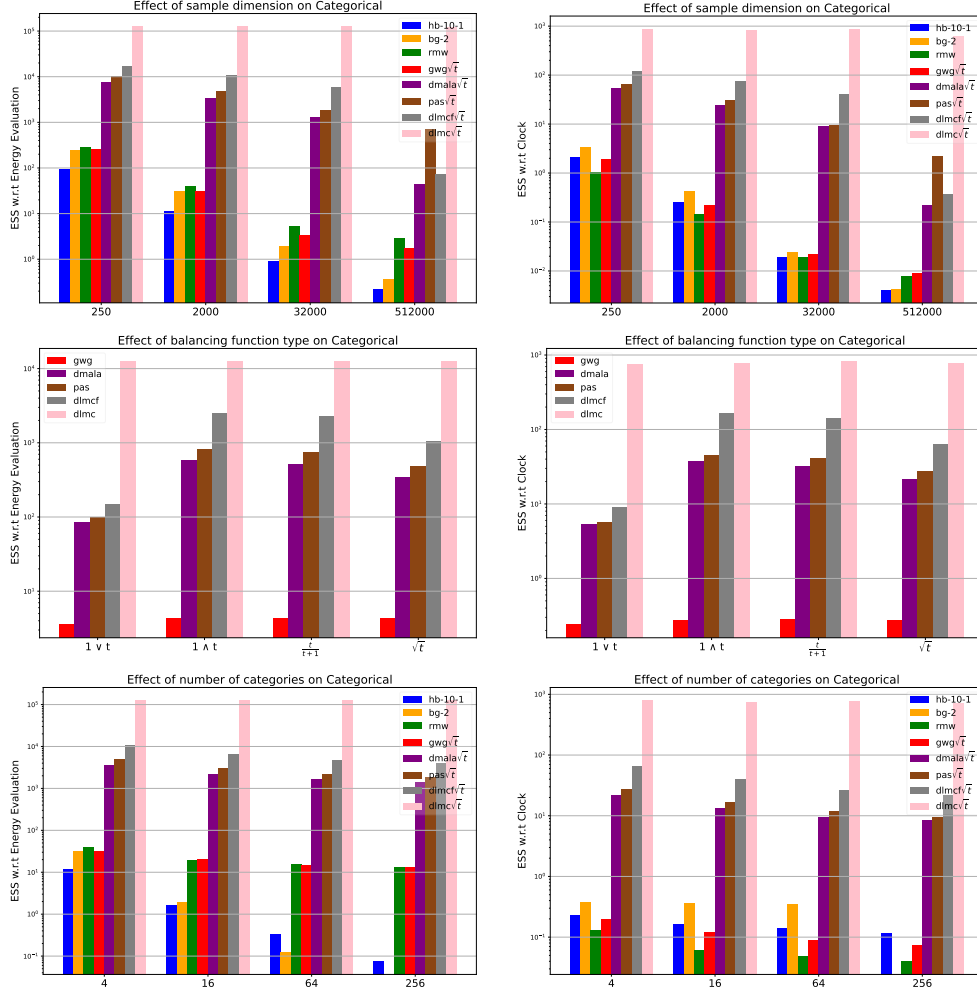

Figure 8: Results on Categorical Models

Table 3: Synthetic data statistics.

| Name             | MIS          |                 | Max Clique | Maxcut |       |
|------------------|--------------|-----------------|------------|--------|-------|
|                  | ER-[700-800] | ER-[9000-11000] | RB         | ER     | BA    |
| Max # nodes      | 800          | 10,915          | 475        | 1,100  | 1,100 |
| Max # edges      | 47,885       | 1,190,799       | 90,585     | 91,239 | 4,384 |
| # Test instances | 128          | 16              | 500        | 1,000  | 1,000 |

433 the maximum number of nodes/edges in a graph, and the number of test instances are reported in  
 434 3. Additionally the statistics of real-world graphs are in 4. For Maxcut-ba and all Balanced Graph  
 435 Partition and MIS graphs, we used 32 as the number of chains and for Maxcut-opticom, Maxcut-er,  
 436 ans all MaxClique graphs we used 16. The data used for these experiments could be found at DISCS  
 437 DATA.

438 We run all the experiments on 8 V100 GPUs in parallel. For only Maxcut Opticom graph, we use 2  
 439 V100 GPUs. The test instances are divided evenly between the GPUs and are run in parallel. For  
 440 each experiment, we report the average of the best solution found over the number of test instances  
 441 along with the end-to-end run time (in seconds) of each in tables. We report the results for all the

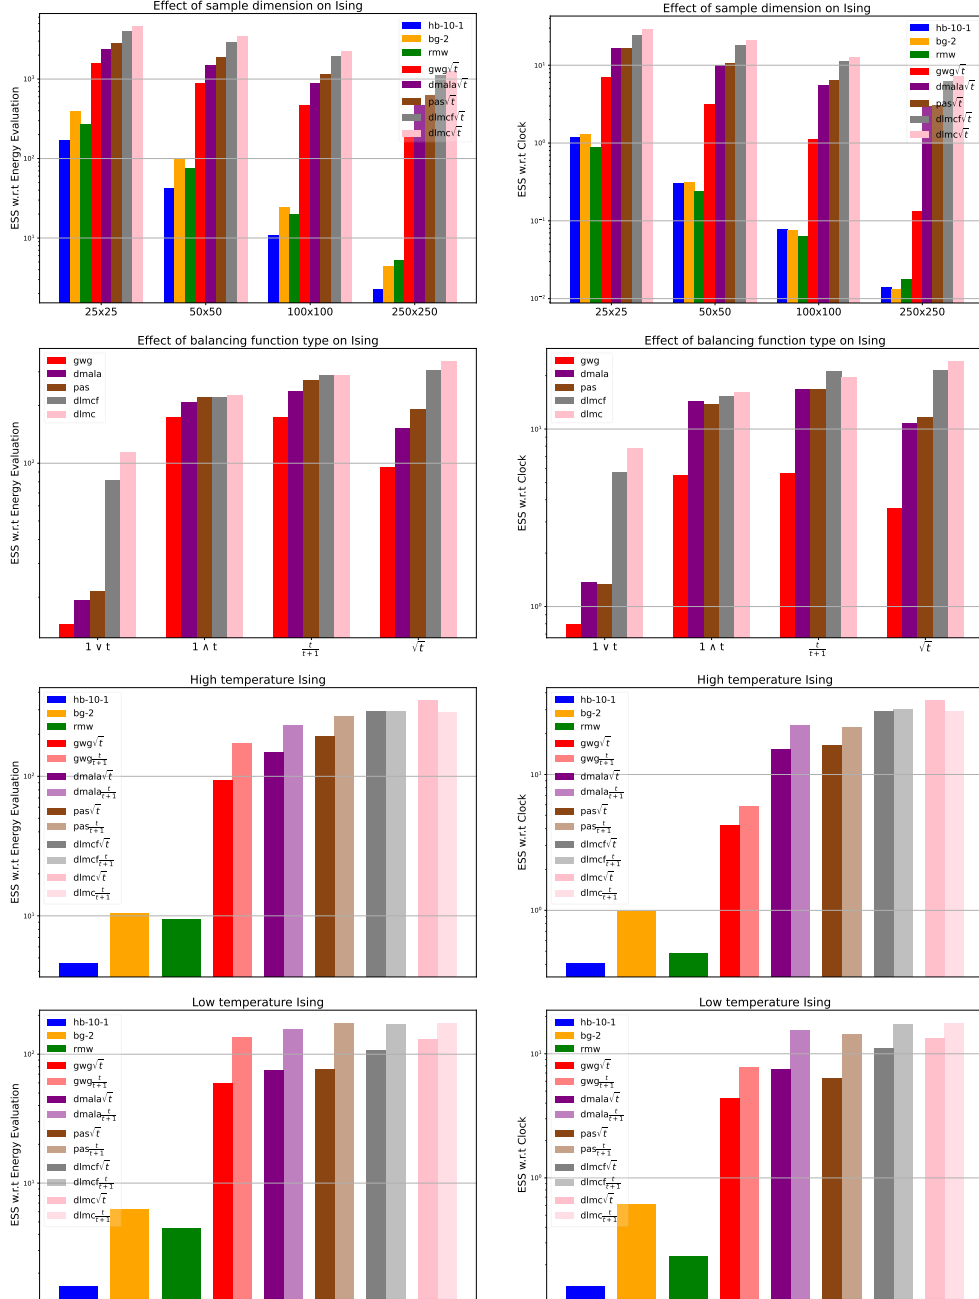

Figure 9: Results on Ising Models

442 samplers and plot the their solution through as the chain is being generated over M-H step and the  
 443 running time.

444 In the following sections, we provide the actual energy function we used for each of the problems  
 445 we experimented in the main paper. For a graph  $G = (V, E)$  we label the nodes in  $V$  from 1 to  $d$ .  
 446 The adjacency matrix is represented as  $A$ . For a weighted graph we simply let  $A_{ij}$  denote the edge  
 447 weight between node  $i$  and  $j$ . For constraint problems, we follow Sun et al. (2022c) to select penalty  
 448 coefficient  $\lambda$  as the minimum value of  $\lambda$  such that  $x^* := \arg \min f(x)$  is achieved at  $x^*$  satisfying  
 449 the original constraints. Such a choice of the coefficient guarantees the target distribution converges



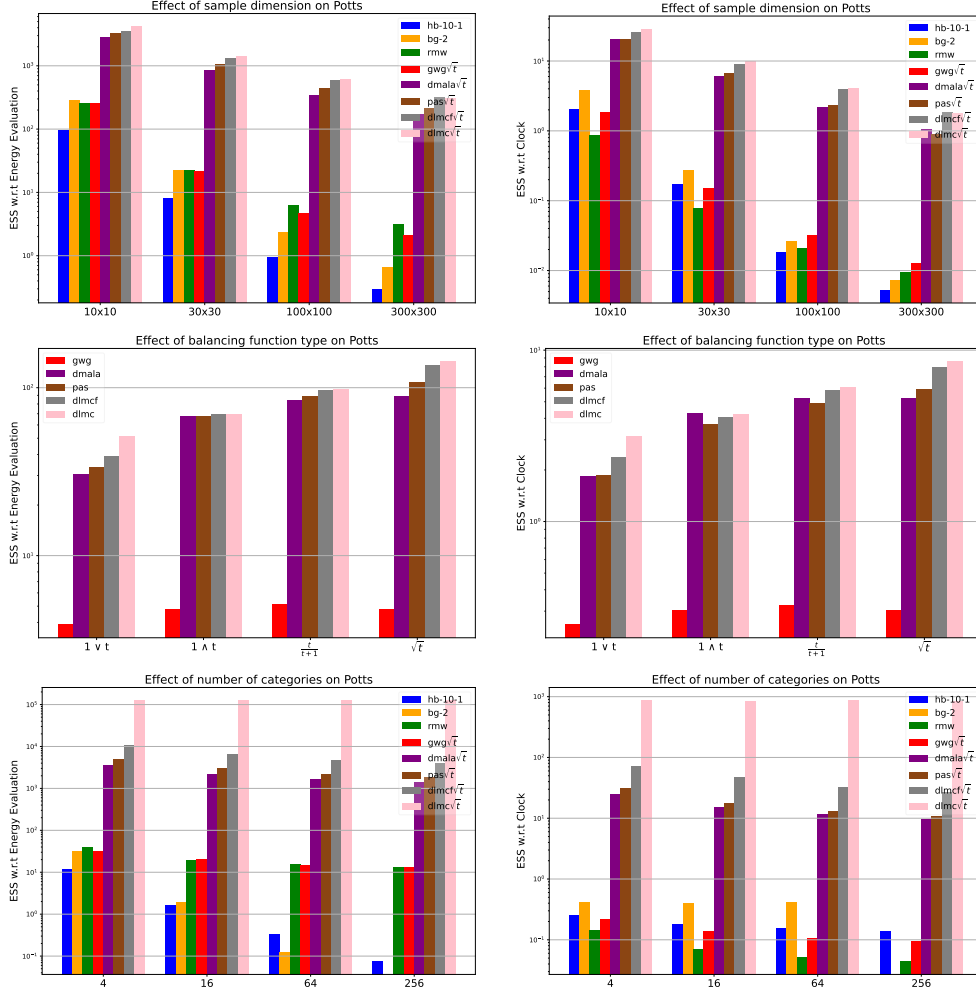

Figure 10: Potts

Table 4: Real-world data statistics.

| Name             | MIS    | Max Clique | Maxcut  | Balanced Graph Partition |       |         |        |           |
|------------------|--------|------------|---------|--------------------------|-------|---------|--------|-----------|
|                  | SATLIB | Twitter    | Opticom | MNIST                    | VGG   | ALEXNET | RESNET | INCEPTION |
| Max # nodes      | 1,347  | 247        | 125     | 414                      | 1,325 | 798     | 20,586 | 27,114    |
| Max # edges      | 5,978  | 12,174     | 375     | 623                      | 2,036 | 1,198   | 32,298 | 40,875    |
| # Test instances | 500    | 196        | 10      | 1                        | 1     | 1       | 1      | 1         |

450 to the optimal solution of the original CO problems while keeping the target distribution as smooth as  
 451 possible.

### 452 A.2.1 MIS

453 The MIS has the integer programming formulation as

$$\min_{x \in \{0,1\}^d} - \sum_{i=1}^d c_i x_i, \quad \text{s.t. } x_i x_j = 0, \quad \forall (i, j) \in E \quad (12)$$

454 We use the corresponding energy function in the following quadratic form:

$$f(x) := -c^T x + \lambda \frac{x^T A x}{2} \quad (13)$$

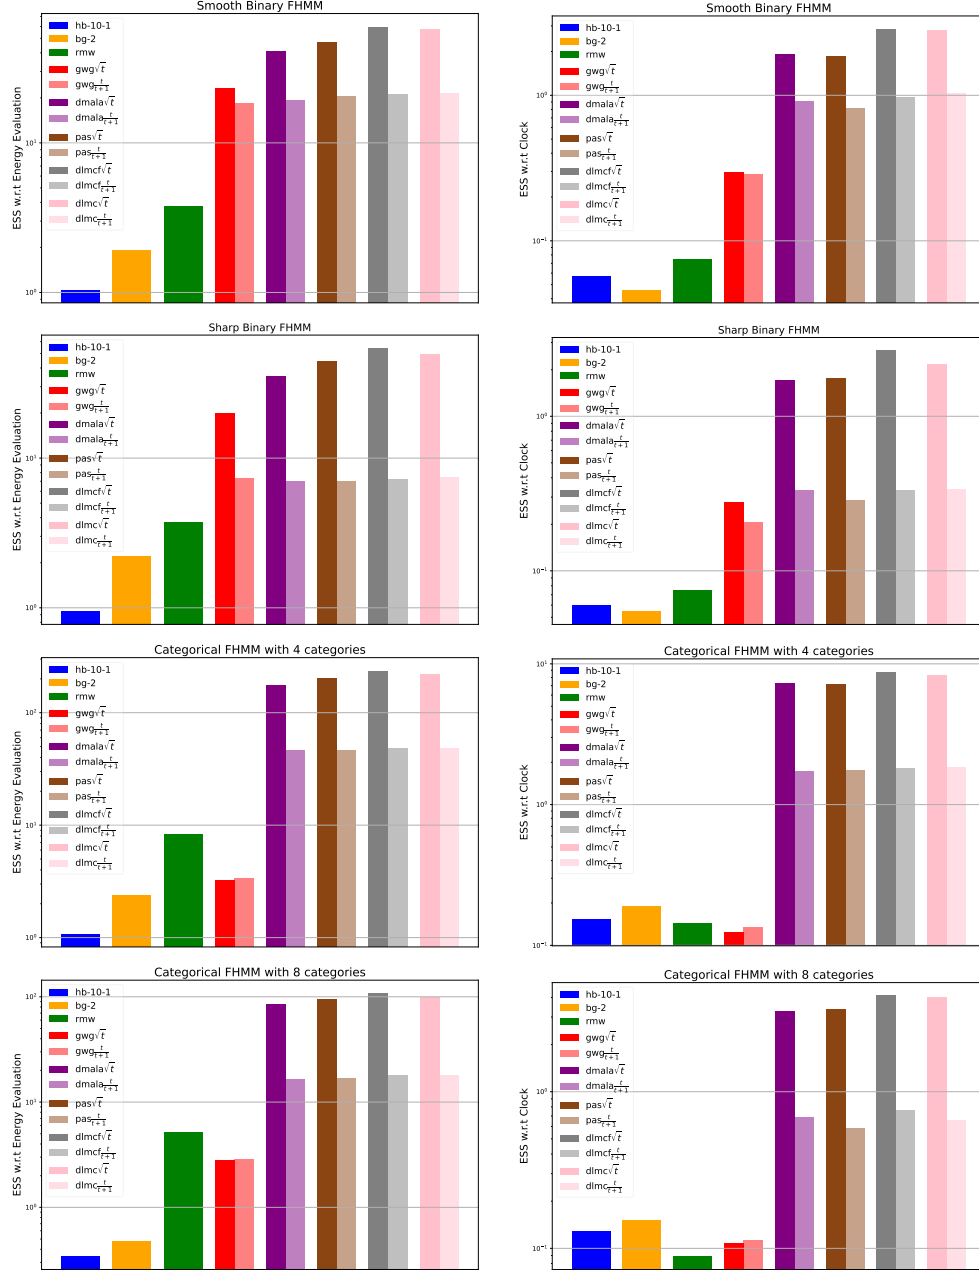

Figure 11: Results on FHMMs

455 In our experiments  $c$  equals to 1 and we use  $\lambda = 1.0001$ . In post processing, we iteratively go through  
 456 all nodes  $x_i$  for  $i = 1, \dots, d$ . If there exists  $x_j = 1$  for  $(x_i, x_j) \in E$ , we flip its value  $x_j = 0$ . After  
 457 post processing, the state  $x$  is guaranteed to be feasible in the original MIS problem. We provide the  
 458 average of the best solutions over all number of instances along with their corresponding running  
 459 time at 5. The plots of the experiments could be found at 12.

460 We also conduct experiments to justify the results are robust regarding the choice of the penalty  
 461 coefficient. In Figure 13, we use penalty coefficient  $\lambda \in \{1.001, 1.01, 1.1, 2\}$  on ER-[700-800]  
 462 graphs with density  $\{0.05, 0.10, 0.15, 0.20, 0.25\}$ . We also use a dashed line to represent the optimal  
 463 value obtained by running Gurobi-10 for 1 hour. From the results, we can observe that 1) PAS

Table 5: MIS.

| Sampler | Graphs Density | ER[700-800] |         |         |         |         | ER[9000-11000] | SATLIB   |
|---------|----------------|-------------|---------|---------|---------|---------|----------------|----------|
|         |                | 0.05        | 0.10    | 0.15    | 0.20    | 0.25    | 0.15           |          |
| HB-10-1 | Size           | 100.374     | 58.750  | 41.812  | 32.344  | 26.469  | 277.149        | 422.427  |
|         | Time(s)        | 426.185     | 390.810 | 684.590 | 414.067 | 429.879 | 15139.425      | 5381.857 |
| BG-2    | Size           | 102.468     | 60.000  | 42.820  | 32.250  | 27.312  | 316.170        | 422.200  |
|         | Time(s)        | 291.427     | 290.042 | 562.986 | 295.024 | 288.109 | 13079.125      | 3027.204 |
| RMW     | Size           | 97.186      | 56.249  | 40.429  | 31.219  | 25.594  | -555.674       | 420.284  |
|         | Time(s)        | 284.092     | 293.517 | 499.577 | 297.140 | 281.772 | 12401.737      | 2955.729 |
| GWG-nA  | Size           | 104.812     | 62.125  | 44.383  | 34.812  | 28.187  | 367.310        | 422.971  |
|         | Time(s)        | 278.885     | 308.873 | 737.671 | 303.435 | 310.551 | 24698.296      | 3540.670 |
| DMALA   | Size           | 104.750     | 62.031  | 44.195  | 34.375  | 28.031  | 357.058        | 423.641  |
|         | Time(s)        | 291.271     | 292.131 | 714.614 | 297.848 | 298.732 | 24769.380      | 3465.343 |
| PAS     | Size           | 105.062     | 62.250  | 44.570  | 34.719  | 28.500  | 377.123        | 424.143  |
|         | Time(s)        | 299.004     | 310.765 | 759.372 | 299.569 | 308.475 | 25242.166      | 4826.039 |
| DLMCF   | Size           | 104.450     | 62.219  | 44.078  | 34.469  | 28.125  | 354.121        | 423.387  |
|         | Time(s)        | 291.366     | 301.554 | 726.287 | 302.667 | 300.413 | 24892.216      | 3679.425 |
| DLMC    | Size           | 104.844     | 62.187  | 44.273  | 34.500  | 28.281  | 355.058        | 423.479  |
|         | Time(s)        | 293.235     | 294.975 | 725.326 | 294.688 | 299.884 | 24976.312      | 3523.320 |

464 consistently obtains the best results, 2) locally balanced samplers have results consistently better than  
465 traditional sampler and Gurobi.

## 466 A.2.2 Max Clique

467 The max clique problem is equivalent to MIS on the dual graph. In our experiments  $c$  equals to 1.

$$\min_{x \in \{0,1\}^d} - \sum_{i=1}^d c_i x_i, \quad \text{s.t. } x_i x_j = 0, \forall (i, j) \notin E \quad (14)$$

468 The energy function is

$$f(x) := -c^T x + \frac{\lambda}{2} (\mathbf{1}^T x \cdot (\mathbf{1}^T x - 1) - x^T A x) \quad (15)$$

469 In our experiments  $c$  equals to 1 and we use  $\lambda = 1.0001$ . In post processing, we iteratively go through  
470 all nodes  $x_i$  for  $i = 1, \dots, d$ . If there exists  $x_j = 1$  for  $(x_i, x_j) \notin E$ , we flip its value  $x_j = 0$ . After  
471 post processing, the state  $x$  is guaranteed to be feasible in the original Max Clique problem. We  
472 provide the average of the best solutions over all number of instances along with their corresponding  
473 running time at 6. The plots of the experiments could be found at 14.

## 474 A.2.3 Maxcut

475 We optimize the following problem:

$$\min_{x \in \{-1,1\}^d} - \sum_{(i,j) \in E} A_{i,j} \left( \frac{1 - x_i x_j}{2} \right) \quad (16)$$

476 Note that for simplicity each dimension of  $x$  is selected from  $\{-1, 1\}$ . To represent the corresponding  
477 energy function for  $x \in \{0, 1\}^d$ , we have

$$f(x) := - \sum_{(i,j) \in E} A_{i,j} \left( \frac{1 - (2x_i - 1)(2x_j - 1)}{2} \right) \quad (17)$$

478 In our experiments  $A_{i,j}$  equals to 1. Since the problem is always feasible, the post processing is  
479 identity map. We provide the average of the best solutions over all number of instances along with  
480 their corresponding running time at 7. The plots of the experiments could be found at 15.

Table 6: Max Clique.

| Sampler | Results        | RB       | TWITTER |
|---------|----------------|----------|---------|
| HB-10-1 | Ratio $\alpha$ | 0.850    | 0.966   |
|         | Time(s)        | 1724.893 | 6.817   |
| BG-2    | Ratio $\alpha$ | 0.859    | 0.995   |
|         | Time(s)        | 1592.808 | 6.327   |
| RMW     | Ratio $\alpha$ | 0.841    | 0.584   |
|         | Time(s)        | 1683.397 | 5.664   |
| GWG-nA  | Ratio $\alpha$ | 0.878    | 0.999   |
|         | Time(s)        | 2525.801 | 6.032   |
| DMALA   | Ratio $\alpha$ | 0.876    | 0.999   |
|         | Time(s)        | 2561.617 | 6.190   |
| PAS     | Ratio $\alpha$ | 0.878    | 0.999   |
|         | Time(s)        | 2542.538 | 6.160   |
| DLMCF   | Ratio $\alpha$ | 0.871    | 0.999   |
|         | Time(s)        | 2532.835 | 5.988   |
| DLMC    | Ratio $\alpha$ | 0.875    | 0.999   |
|         | Time(s)        | 2639.588 | 6.124   |

Table 7: Maxcut.

| Sampler | Results        | BA      |         |         |         |         |          | ER        |         |         | OPTSICOM |           |
|---------|----------------|---------|---------|---------|---------|---------|----------|-----------|---------|---------|----------|-----------|
|         |                | 16-20   | 32-10   | 64-75   | 128-150 | 256-300 | 512-600  | 1024-1100 | 256-300 | 512-600 |          | 1024-1100 |
| HB-10-1 | Ratio $\alpha$ | 1.000   | 1.000   | 1.000   | 1.000   | 1.000   | 1.008    | 1.014     | 1.020   | 1.000   | 0.998    | 1.000     |
|         | Time(s)        | 742.568 | 754.613 | 749.626 | 783.278 | 792.338 | 1143.302 | 1890.534  | 331.019 | 416.002 | 1488.382 | 75.347    |
| BG-2    | Ratio $\alpha$ | 1.000   | 1.000   | 1.000   | 1.000   | 1.000   | 1.009    | 1.014     | 1.021   | 1.001   | 0.999    | 1.000     |
|         | Time(s)        | 517.183 | 538.258 | 550.082 | 553.863 | 531.720 | 578.991  | 1157.571  | 269.116 | 337.014 | 1295.219 | 17.050    |
| RMW     | Ratio $\alpha$ | 0.998   | 1.000   | 1.000   | 1.000   | 0.999   | 1.005    | 1.007     | 1.019   | 0.997   | 0.996    | 1.000     |
|         | Time(s)        | 534.215 | 534.615 | 528.641 | 558.608 | 541.302 | 574.778  | 1065.852  | 267.071 | 333.402 | 1266.630 | 58.960    |
| GWG-nA  | Ratio $\alpha$ | 1.000   | 1.000   | 1.000   | 1.000   | 1.000   | 1.010    | 1.017     | 1.021   | 1.002   | 1.001    | 1.000     |
|         | Time(s)        | 522.094 | 531.425 | 578.917 | 551.923 | 545.634 | 724.721  | 1427.577  | 264.202 | 466.199 | 1666.021 | 80.124    |
| DMALA   | Ratio $\alpha$ | 1.000   | 1.000   | 1.000   | 1.000   | 1.000   | 1.010    | 1.018     | 1.021   | 1.002   | 1.002    | 1.000     |
|         | Time(s)        | 531.433 | 538.938 | 568.224 | 549.026 | 544.568 | 750.909  | 1490.872  | 277.855 | 461.179 | 1643.135 | 53.509    |
| PAS     | Ratio $\alpha$ | 1.000   | 1.000   | 1.000   | 1.000   | 1.000   | 1.010    | 1.018     | 1.021   | 1.002   | 1.002    | 1.000     |
|         | Time(s)        | 519.842 | 538.814 | 550.035 | 550.578 | 580.051 | 940.408  | 1917.954  | 278.005 | 543.607 | 1689.071 | 59.213    |
| DLMCF   | Ratio $\alpha$ | 1.000   | 1.000   | 1.000   | 1.000   | 1.000   | 1.010    | 1.018     | 1.021   | 1.002   | 1.001    | 1.000     |
|         | Time(s)        | 521.592 | 526.289 | 545.877 | 557.564 | 533.119 | 765.719  | 1510.380  | 272.841 | 452.252 | 1639.539 | 52.552    |
| DLMC    | Ratio $\alpha$ | 1.000   | 1.000   | 1.000   | 1.000   | 1.000   | 1.010    | 1.018     | 1.021   | 1.002   | 1.002    | 1.000     |
|         | Time(s)        | 531.003 | 550.118 | 543.287 | 544.611 | 542.677 | 765.104  | 1564.198  | 271.262 | 451.080 | 1642.223 | 53.368    |

#### 481 A.2.4 Balanced graph partition

482 We find the following objective for balanced graph partition gives the best result:

$$f(x) := \sum_{s=1}^k \sum_{(i,j) \in E} \mathbb{I}(x_i \neq x_j \& \& (x_i = s | x_j = s)) + \sum_{s=1}^k \left( d/k - \sum_{i=1}^d \mathbb{I}(x_i = s) \right)^2 \quad (18)$$

483 where  $k$  is the number of partitions. Since the problem is always feasible, the post processing is  
 484 identity map. We provide the edge cut ratio and balanceness of the best samples over all the chains at  
 485 8.

### 486 A.3 Energy Based Generative Models

#### 487 A.3.1 Restricted Boltzmann Machine

488 The RBM is an unnormalized latent variable model, with a visible random variable  $v \in \mathcal{C}^N$  and a  
 489 hidden random variable  $h \in \{0, 1\}^M$ . When  $v$  is binary, we call it a binary RBM (binRBM) and  
 490 when  $v$  is categorical, we call it a categorical RBM (catRBM). The energy function of both binRBM  
 491 and catRBM (Tran et al., 2011) can be written as:

$$f(v) = \sum_h \left[ - \sum_{n=1}^N \langle v_n, \theta_n \rangle - \sum_{m=1}^M \beta_m h_m - \sum_{d,m} \langle h_m \theta_{m,d}, v_n \rangle \right] \quad (19)$$

Table 8: Balanced graph partition.

| Metric           | Samplers      | VGG          | MNIST-conv   | ResNet       | AlexNet      | Inception-v3 |
|------------------|---------------|--------------|--------------|--------------|--------------|--------------|
| Edge cut ratio ↓ | HB-10-1       | 0.050        | 0.046        | 0.050        | 0.037        | 0.065        |
|                  | BG-2          | <b>0.048</b> | <b>0.045</b> | 0.050        | 0.038        | 0.069        |
|                  | RMW           | 0.054        | 0.046        | 0.092        | 0.052        | 0.117        |
|                  | GWG           | 0.102        | 0.046        | 0.159        | 0.063        | 0.164        |
|                  | DMALA         | 0.084        | 0.058        | 0.178        | 0.063        | 0.176        |
|                  | DMALA-nA      | 0.059        | <b>0.045</b> | 0.048        | 0.039        | 0.054        |
|                  | PAS           | 0.053        | <b>0.045</b> | <b>0.047</b> | <b>0.037</b> | <b>0.052</b> |
|                  | PAS-nA        | 0.084        | 0.050        | 0.138        | 0.053        | 0.144        |
|                  | DLMCF         | 0.086        | 0.063        | 0.178        | 0.053        | 0.176        |
|                  | DLMCF-nA      | 0.092        | 0.069        | 0.048        | 0.085        | <b>0.052</b> |
|                  | DLMC          | 0.105        | 0.056        | 0.183        | 0.097        | 0.182        |
|                  | DLMC-nA       | 0.113        | 0.048        | 0.082        | 0.091        | 0.086        |
|                  | Balanceness ↑ | HB-10-1      | 0.999        | 0.999        | 0.999        | 0.999        |
| BG-2             |               | 0.999        | 0.997        | 0.999        | 0.999        | 0.999        |
| RMW              |               | 0.999        | 0.998        | 0.999        | 0.999        | 0.999        |
| GWG              |               | 0.999        | 0.997        | 0.999        | 0.999        | 0.999        |
| DMALA            |               | 0.999        | 0.998        | 0.999        | 0.999        | 0.999        |
| DMALA-nA         |               | 0.999        | 0.997        | 0.999        | 0.999        | 0.999        |
| PAS              |               | 0.999        | 0.997        | 0.999        | 1.000        | 0.999        |
| PAS-nA           |               | 0.999        | 0.998        | 0.999        | 0.999        | 0.999        |
| DLMCF            |               | 0.999        | 0.997        | 0.999        | 0.999        | 0.999        |
| DLMCF-nA         |               | 0.999        | 0.995        | 0.999        | 0.999        | 0.999        |
| DLMC             |               | 0.999        | 0.994        | 0.999        | 0.999        | 0.999        |
| DLMC-nA          |               | 0.999        | 0.993        | 0.999        | 0.999        | 0.999        |

492 Unlike the previous three models, where the parameters are hand designed, we train binary RBM  
493 on MNIST (LeCun, 1998) and categorical RBM on Fashion-MNIST (Xiao et al., 2017a) using  
494 contrastive divergence Hinton (2002). Across all settings, we have  $D = 784$ . For binary models, we  
495 use  $M = 25$  for high temperature setting and  $M = 200$  for low temperature setting. For categorical  
496 models, we use  $M = 100$ . We report the results in Figure 16. The experimental setup is similar to  
497 classical graphical models.

### 498 A.3.2 Deep residual network

499 In this experiment, we train a deep residual network on MNIST, Omniglot and Caltech dataset.  
500 The model parameters and experimental setup could be found at DISCS DATA. We then use all the  
501 samplers to sample from the trained energy models. We use the chain length of 10k and number of  
502 chains of 100. We randomly selected one chain from the 100 chains and save its sample after each  
503 1k steps, giving us 10 images per each chain for each sampler 17. We can see that locally balanced  
504 samplers are able to generate higher quality images faster and visit more diverse modalities.

### 505 A.3.3 Text Infilling

506 Here we additionally provide the performance of the locally balanced samplers in their non adaptive  
507 condition observed at 9. The data used for this experiment could be found at DISCS DATA.

Table 9: Quantative results on text infilling. The reference text for computing the Corpus BLEU is the combination of WT103 and TBC.

| Methods                  | Self-BLEU ( $\downarrow$ ) | Unique $n$ -grams (%) ( $\uparrow$ ) |         |         |         |         |         | Corpus BLEU ( $\uparrow$ ) |
|--------------------------|----------------------------|--------------------------------------|---------|---------|---------|---------|---------|----------------------------|
|                          |                            | Self                                 |         | WT103   |         | TBC     |         |                            |
|                          |                            | $n = 2$                              | $n = 3$ | $n = 2$ | $n = 3$ | $n = 2$ | $n = 3$ |                            |
| RMW                      | 92.41                      | 6.26                                 | 9.10    | 18.97   | 26.73   | 19.33   | 26.67   | 16.24                      |
| GWG $\sqrt{t}$           | 85.93                      | 11.22                                | 17.14   | 23.16   | 35.56   | 23.58   | 35.56   | 16.75                      |
| GWG $\frac{t}{t+1}$      | 81.15                      | 15.47                                | 22.70   | 25.62   | 38.91   | 25.62   | 38.58   | 16.68                      |
| DMALA-nA $\sqrt{t}$      | 83.99                      | 13.26                                | 19.52   | 24.33   | 36.40   | 25.30   | 36.40   | 16.37                      |
| DMALA-nA $\frac{t}{t+1}$ | 80.44                      | 15.86                                | 23.58   | 25.79   | 39.88   | 26.57   | 40.20   | 16.64                      |
| DMALA $\sqrt{t}$         | 85.88                      | 11.58                                | 17.14   | 22.07   | 34.08   | 23.22   | 34.15   | 17.06                      |
| DMALA $\frac{t}{t+1}$    | 80.21                      | 16.36                                | 23.71   | 25.60   | 39.39   | 26.75   | 39.72   | 16.53                      |
| PAS $\sqrt{t}$           | 85.39                      | 11.37                                | 17.60   | 22.61   | 35.53   | 23.65   | 35.47   | 16.57                      |
| PAS $\frac{t}{t+1}$      | 81.02                      | 15.62                                | 22.65   | 25.59   | 39.28   | 26.08   | 39.48   | 16.69                      |
| DLMCf-nA $\sqrt{t}$      | 91.57                      | 7.25                                 | 10.42   | 19.53   | 28.31   | 20.13   | 28.18   | 16.56                      |
| DLMCf-nA $\frac{t}{t+1}$ | 81.66                      | 15.31                                | 21.78   | 26.39   | 39.56   | 27.60   | 39.69   | 16.31                      |
| DLMCf $\sqrt{t}$         | 88.39                      | 9.53                                 | 14.06   | 21.00   | 31.85   | 22.27   | 31.98   | 16.70                      |
| DLMCf $\frac{t}{t+1}$    | 80.12                      | 16.25                                | 23.76   | 25.41   | 39.31   | 26.86   | 39.57   | 16.73                      |
| DLMC-nA $\sqrt{t}$       | 83.74                      | 12.74                                | 19.64   | 24.27   | 37.27   | 24.94   | 37.34   | 16.73                      |
| DLMC-nA $\frac{t}{t+1}$  | 82.26                      | 14.18                                | 21.41   | 25.51   | 39.10   | 26.18   | 39.29   | 16.55                      |
| DLMC $\sqrt{t}$          | 85.28                      | 12.05                                | 17.65   | 24.03   | 36.34   | 24.51   | 36.27   | 16.45                      |
| DLMC $\frac{t}{t+1}$     | 84.55                      | 12.62                                | 18.47   | 24.27   | 37.28   | 24.94   | 37.14   | 16.69                      |

ER[800-800-0.05]

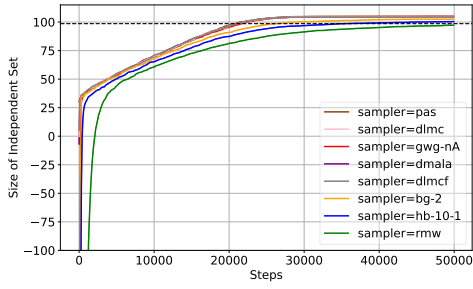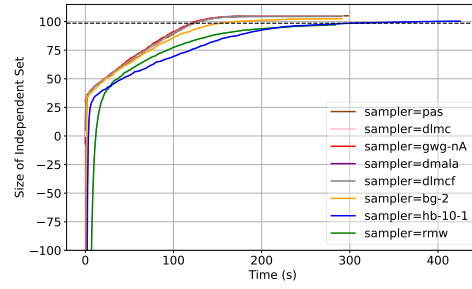

ER[800-800-0.10]

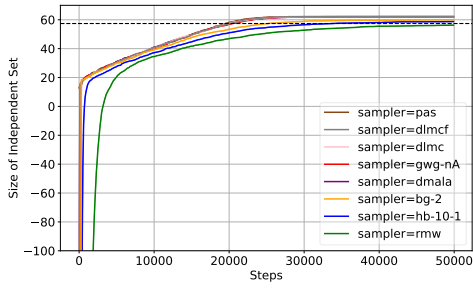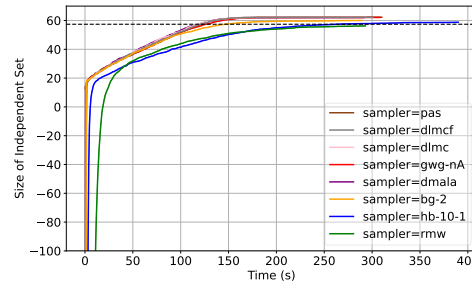

ER[800-800-0.20]

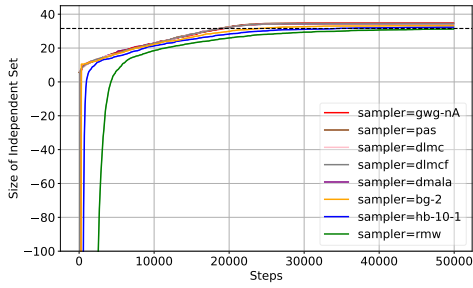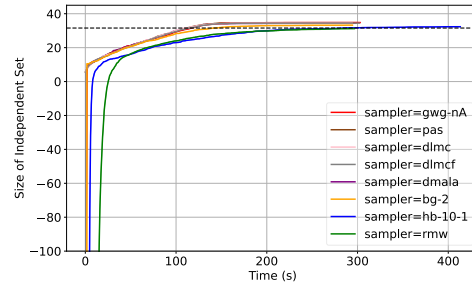

ER[800-800-0.25]

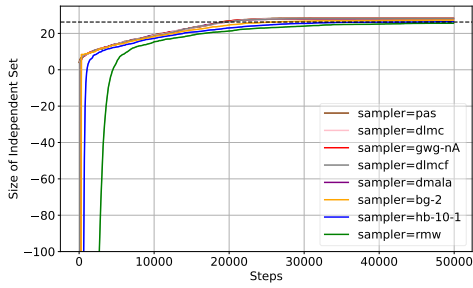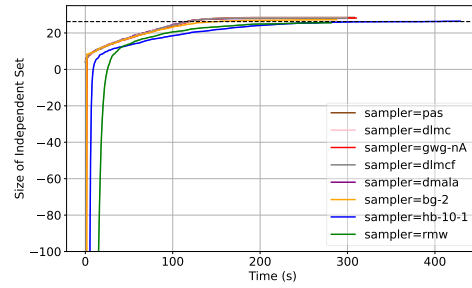

SATLIB

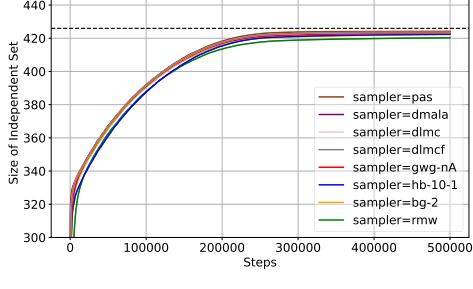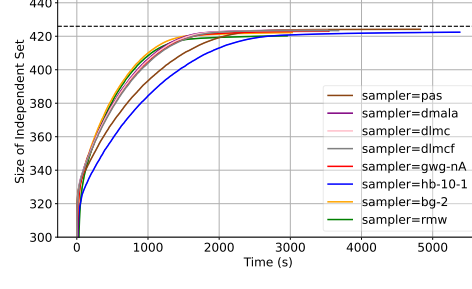

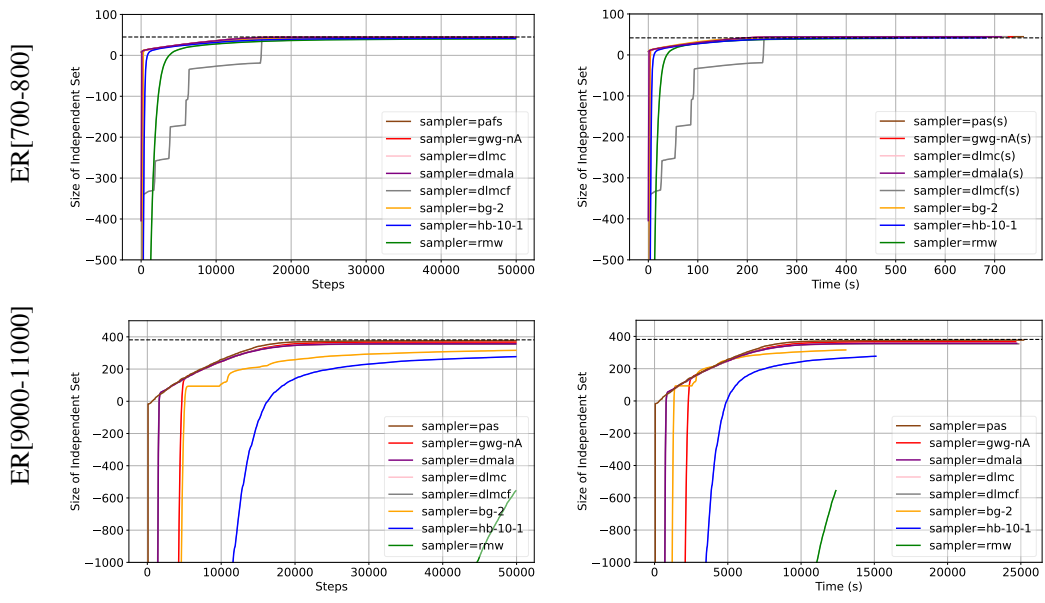

Figure 12: Solving progress on MIS



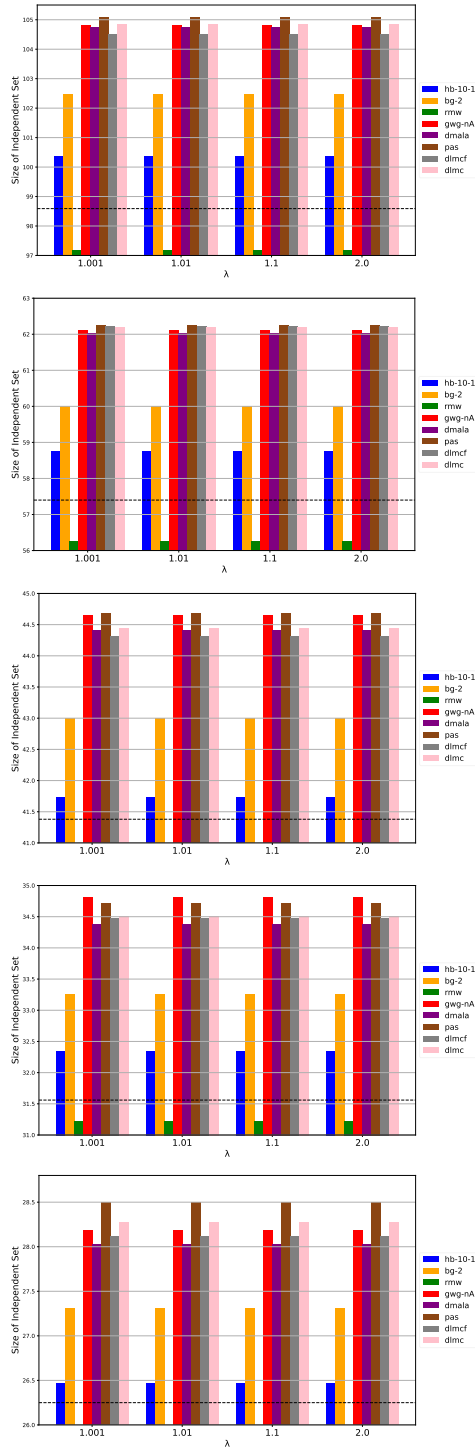

Figure 13: Results on MIS: effect of penalty coefficient. (top)-(bottom) ER-[700-800] with density  $\{0.05, 0.10, 0.15, 0.20, 0.25\}$ . The dashed line represents the best result obtained by running Gurobi for 1 hour.

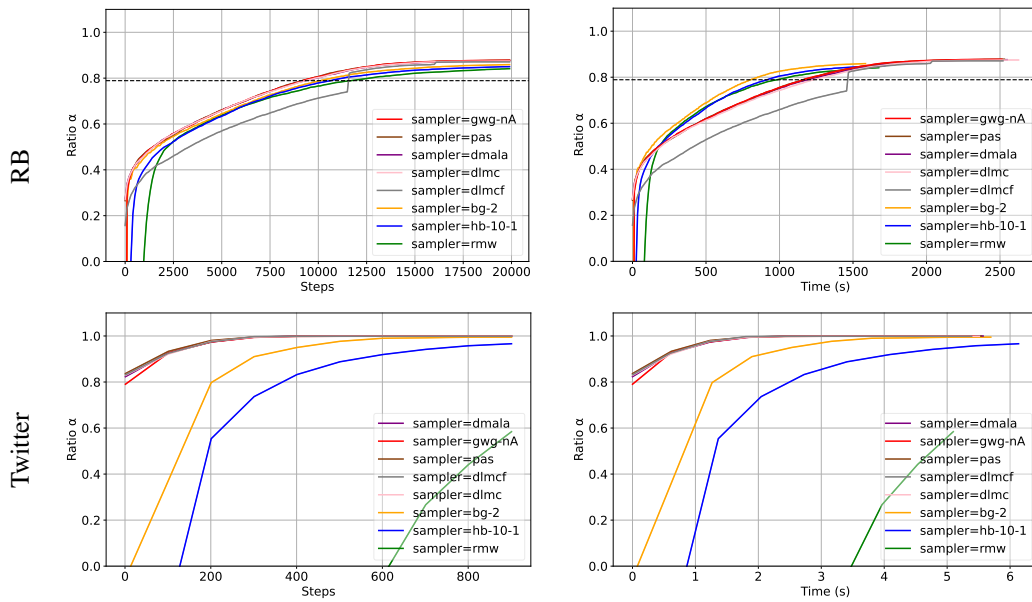

Figure 14: Solving progress on Max Clique

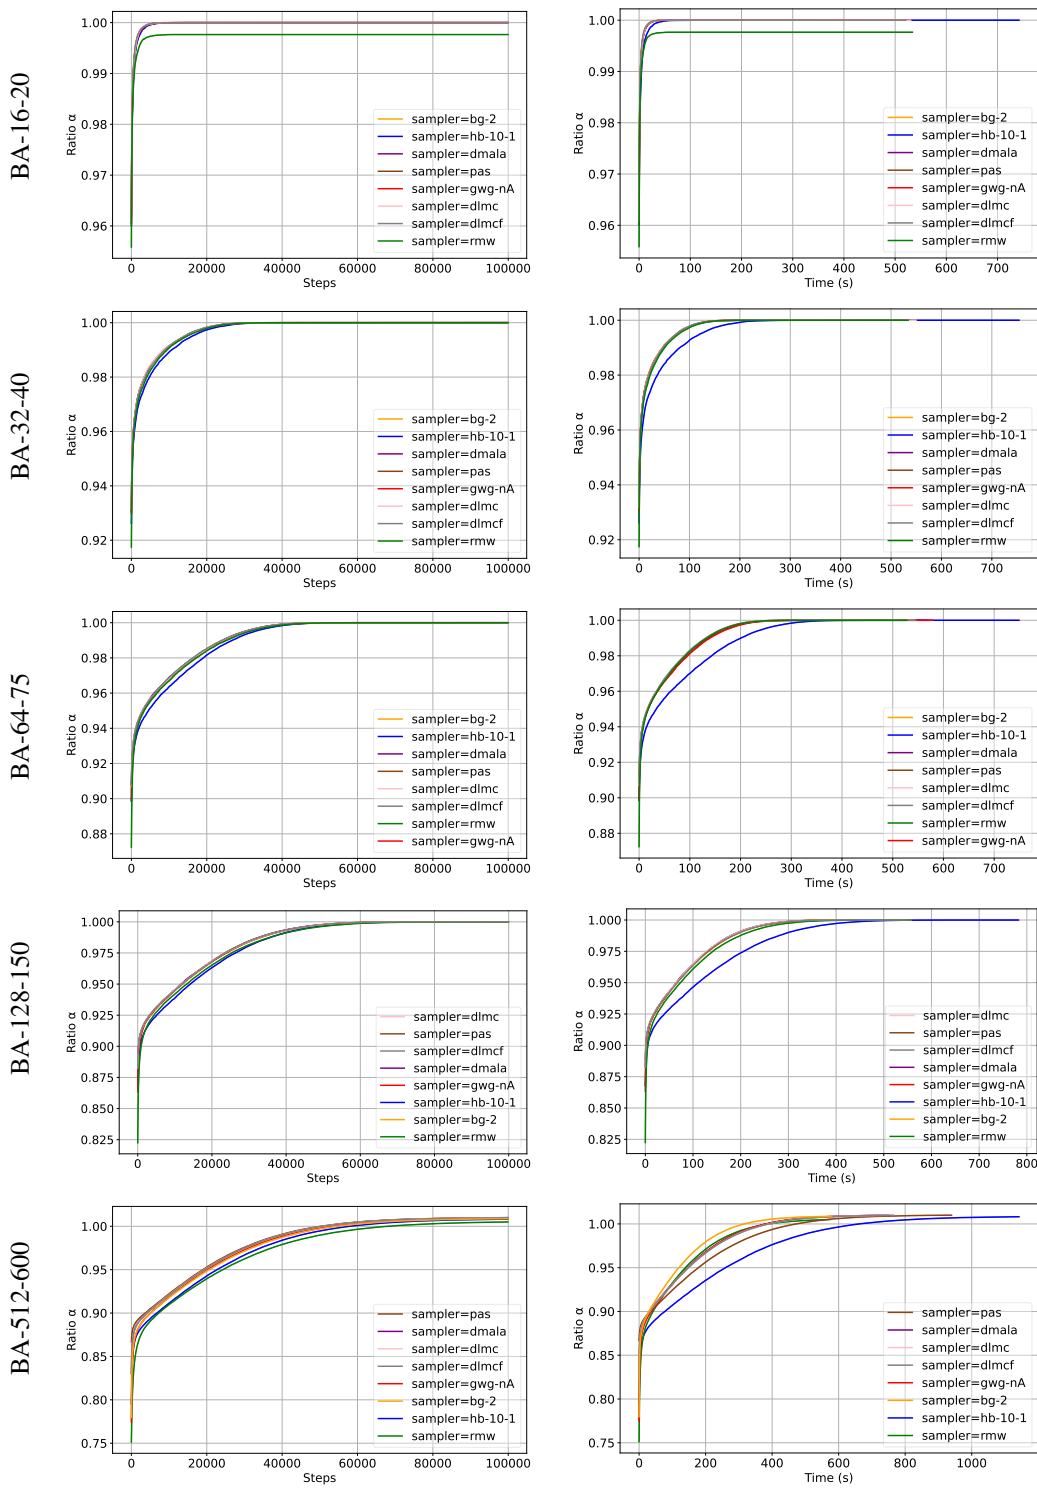

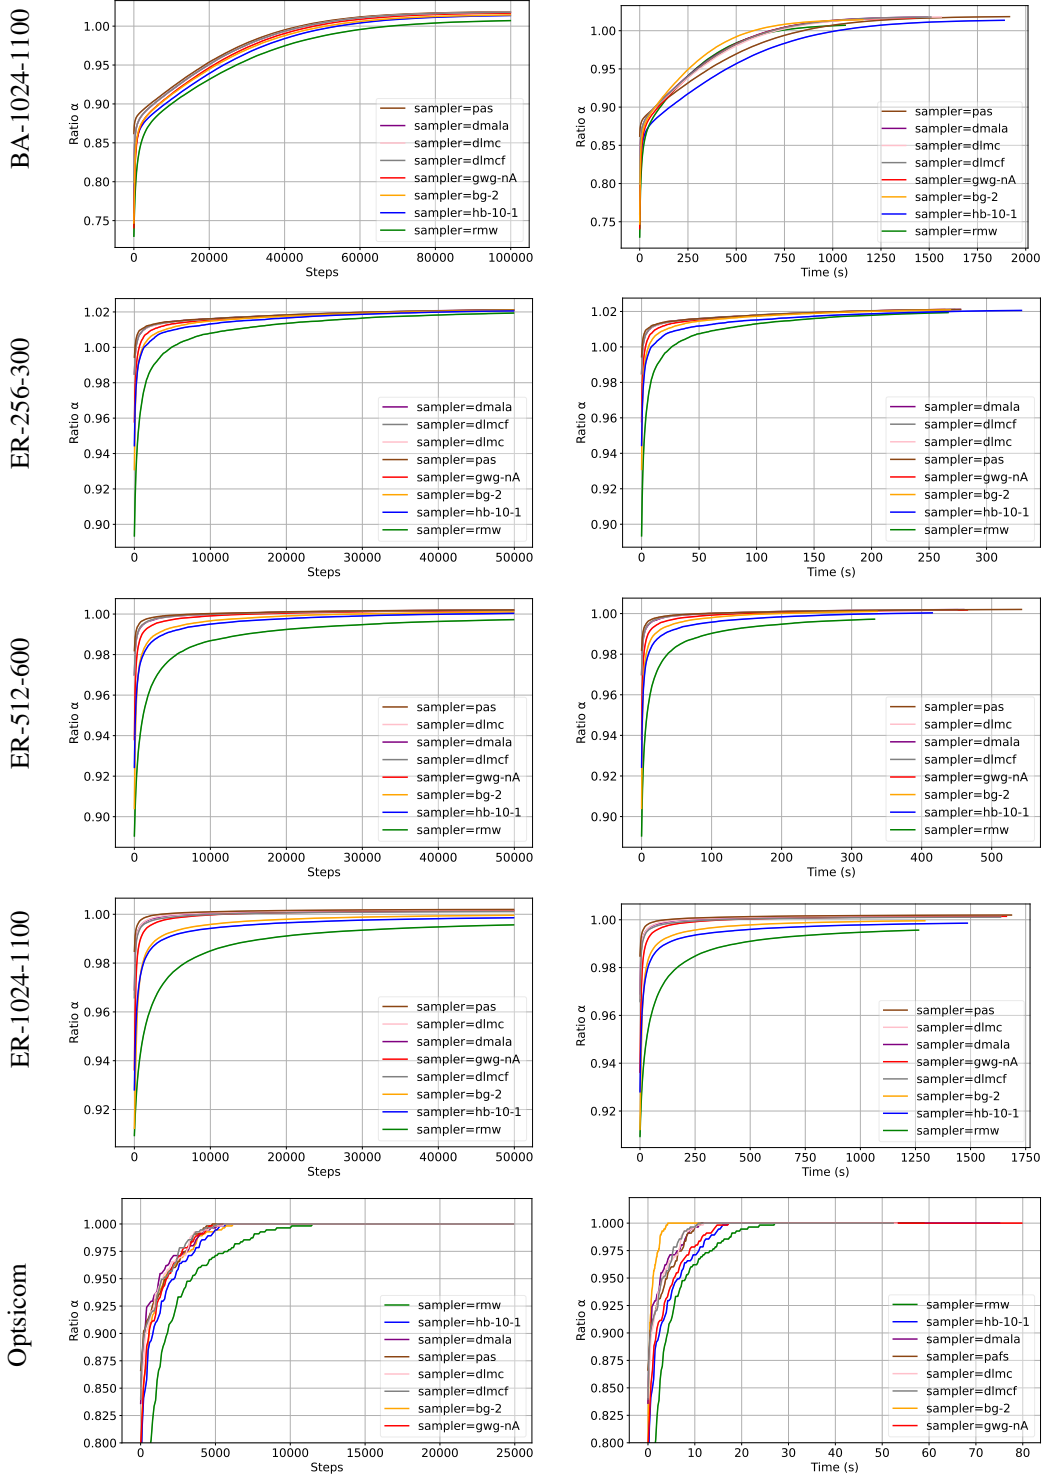

Figure 15: Maxcut

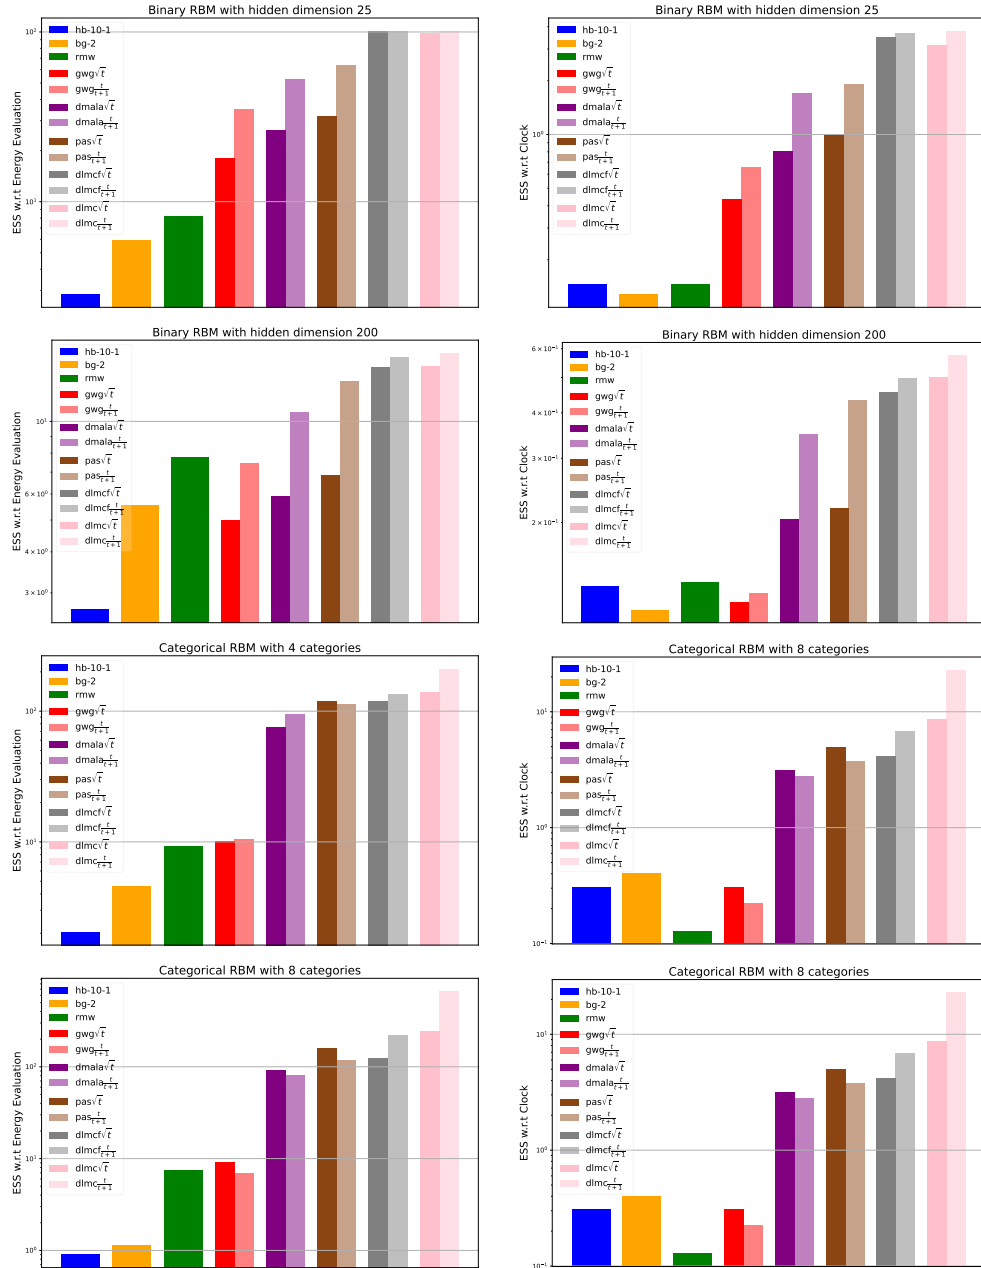

Figure 16: Results on RBMs

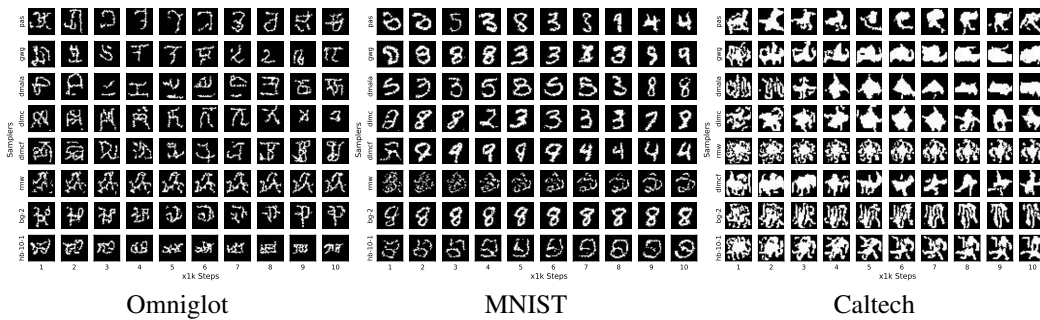

Figure 17: Resnet EBM
